# Supplementary material for: Multi-State Second-Order Nonlinear Optical Switches Incorporating One to Three Benzazolo-Oxazolidine Units: A Quantum Chemistry Investigation
Source: MDPI journal article supplement (doi:10.3390/molecules27092770), 2022-04-26
Supplement: s1 [file s1]

Multi-State Second-Order Nonlinear Optical Switches  
Incorporating from One to Three Benzazolo-Oxazolidine  
Units: a Quantum Chemistry Investigation  
Supplementary Materials

Pierre Beaujean, Lionel Sanguinet, Vincent Rodriguez, Frédéric Castet,  
and Benoît Champagne

Version of April 25, 2022

**Preamble.** The weight,  $w_i$ , of a given conformer with a Gibbs free energy  $\Delta G_i^0$  (in  $\text{kJ mol}^{-1}$ ) in an ensemble of  $N$  conformers  $\{\Delta G_j^0 | 0 < j \leq N\}$  and within a Maxwell-Boltzmann (MB) statistic, is computed as:

$$w_i = \frac{e^{\frac{-\Delta G_i^0}{RT}}}{\sum_j^N e^{\frac{-\Delta G_j^0}{RT}}}, \quad (1)$$

where  $T$  is the temperature (in K) and  $R$  the gas constant ( $8.3145 \text{ J mol}^{-1} \text{ K}^{-1}$ ). The corresponding population,  $P_i$ , for conformer  $i$  is given by  $P_i = 100 w_i$ .

## S1 Geometrical parameters

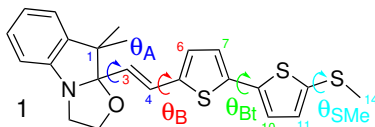

|          | $\Delta G^0$ | $P$  | $\theta_A$      | $\theta_B$    | $\theta_{Bt}$  | $\theta_{SMe}$ | BLA <sub>2,5</sub> |
|----------|--------------|------|-----------------|---------------|----------------|----------------|--------------------|
| <b>C</b> |              |      |                 |               |                |                |                    |
| 1        | 0.0          | 49.2 | 112.5           | -179.9        | -151.2         | -95.2          | 0.147              |
| 2        | 2.0          | 21.7 | 112.8 (+0.3)    | 16.1 (-164.0) | 150.7 (-58.2)  | 95.8 (-169.0)  | 0.150              |
| 3        | 3.0          | 14.7 | 112.6 (+0.1)    | -177.2 (+2.6) | -31.0 (+120.2) | -94.1 (+1.2)   | 0.147              |
| 4        | 5.4          | 5.5  | 112.1 (-0.4)    | 10.4 (-169.7) | 31.3 (-177.6)  | -95.5 (-0.3)   | 0.150              |
| 5        | 5.9          | 4.5  | 112.0 (-0.5)    | 179.4 (-0.7)  | -152.1 (-0.9)  | -1.4 (+93.9)   | 0.146              |
| 6        | 7.8          | 2.1  | 112.1 (-0.5)    | -177.9 (+2.0) | -32.4 (+118.7) | -0.6 (+94.6)   | 0.147              |
| 7        | 9.4          | 1.1  | 112.2 (-0.3)    | 11.4 (-168.7) | 33.2 (-175.6)  | -1.0 (+94.2)   | 0.149              |
| 8        | 9.4          | 1.1  | 112.1 (-0.4)    | 15.9 (-164.2) | 150.4 (-58.5)  | 0.7 (+95.9)    | 0.149              |
| <b>O</b> |              |      |                 |               |                |                |                    |
| 1        | 0.0          | 54.6 | 2.5             | -179.1        | 156.6          | -95.5          | 0.062              |
| 2        | 2.7          | 18.7 | 3.2 (+0.7)      | -178.9 (+0.1) | -24.5 (+179.0) | -95.2 (+0.2)   | 0.062              |
| 3        | 3.2          | 15.1 | 2.4 (-0.1)      | 178.8 (-2.1)  | -162.6 (+40.8) | -3.0 (+92.5)   | 0.056              |
| 4        | 6.3          | 4.2  | 2.7 (+0.2)      | -1.6 (+177.5) | -154.6 (+48.8) | -93.5 (+2.0)   | 0.065              |
| 5        | 7.6          | 2.5  | -162.2 (-164.7) | -177.0 (+2.1) | 156.6 (+0.0)   | -94.7 (+0.7)   | 0.062              |
| 6        | 8.4          | 1.9  | 1.8 (-0.7)      | -1.8 (+177.3) | 25.5 (-131.1)  | 95.3 (-169.2)  | 0.064              |
| 7        | 8.8          | 1.5  | 1.9 (-0.6)      | 0.2 (+179.3)  | 159.2 (+2.7)   | 1.1 (+96.6)    | 0.059              |
| 8        | 10.0         | 1.0  | -161.2 (-163.7) | -178.9 (+0.1) | 25.3 (-131.2)  | 96.5 (-168.0)  | 0.063              |
| 9        | 12.0         | 0.4  | -163.1 (-165.6) | -176.8 (+2.3) | 162.7 (+6.1)   | 3.2 (+98.6)    | 0.056              |

Table S1: Thermochemical and geometrical features of the different conformers of compound **1**, as evaluated at the  $\omega$ B97X-D/6-311G(d)/IEF-PCM(acetonitrile) level of theory: relative Gibbs free energy ( $\Delta G^0$ ,  $\text{kJ mol}^{-1}$ ), corresponding MB population ( $P$ , %) at 298.15 K, torsional angles ( $\theta$ ,  $^\circ$ , with the relative difference with respect to the most stable conformer in parentheses) and bond length alternation (BLA,  $\text{\AA}$ ).

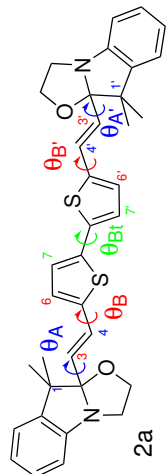

|    | $\Delta G^0$ | $P$  | $\theta_A$     | $\theta_B$     | $\theta_{Bt}$ | $\theta_{B'}$  | $\theta_{A'}$  | $BLA_{2,5}$ | $BLA_{2',5'}$ |
|----|--------------|------|----------------|----------------|---------------|----------------|----------------|-------------|---------------|
| CC |              |      |                |                |               |                |                |             |               |
| 1  | 0.0          | 45.5 | -108.7         | 178.6          | -154.4        | 177.1          | -112.4         | 0.147       | 0.147         |
| 2  | 9.1          | 1.2  | -108.7 (+0.0)  | -15.2 (+166.2) | -153.6 (+0.8) | 178.9 (+1.8)   | 108.5 (-139.1) | 0.149       | 0.147         |
| 3  | 0.8          | 32.5 | 112.1 (-139.1) | 179.6 (+1.0)   | -155.0 (-0.6) | 178.0 (+0.9)   | 108.5 (-139.1) | 0.147       | 0.147         |
| 4  | 3.3          | 12.0 | -109.0 (-0.3)  | 177.7 (-0.9)   | -154.6 (-0.2) | 178.5 (+1.4)   | 108.6 (-139.0) | 0.147       | 0.147         |
| 5  | 11.9         | 0.4  | -108.5 (+0.2)  | -3.1 (+178.3)  | -152.0 (+2.4) | 8.0 (-169.1)   | 108.6 (-139.0) | 0.149       | 0.149         |
| 6  | 7.7          | 2.1  | 112.0 (-139.3) | 8.7 (-169.9)   | -153.3 (+1.1) | -0.2 (-177.3)  | 108.9 (-138.7) | 0.149       | 0.149         |
| 7  | 5.4          | 5.1  | -108.9 (-0.1)  | 178.3 (-0.3)   | -153.2 (+1.2) | -13.3 (+169.6) | -112.1 (+0.3)  | 0.147       | 0.149         |
| 8  | 8.8          | 1.3  | -108.5 (+0.2)  | 178.6 (+0.0)   | -153.9 (+0.5) | 11.3 (-165.8)  | 108.8 (-138.8) | 0.147       | 0.149         |
| CO |              |      |                |                |               |                |                |             |               |
| 1  | 0.0          | 53.1 | -1.8           | -179.6         | -158.8        | 179            | -111.7         | 0.060       | 0.147         |
| 2  | 3.4          | 13.3 | -2.4 (-0.6)    | 179.6 (-0.9)   | -161.6 (-2.8) | 179.5 (+0.5)   | 108.9 (-139.4) | 0.060       | 0.147         |
| 3  | 4.2          | 9.8  | -2.9 (-1.0)    | 178.5 (-1.9)   | -161.6 (-2.7) | -12.9 (+168.1) | -112.3 (-0.7)  | 0.059       | 0.149         |
| 4  | 5.1          | 6.8  | -2.1 (-0.3)    | -1.8 (+177.8)  | -158.2 (+0.6) | 177.7 (-1.2)   | -112.3 (-0.7)  | 0.063       | 0.147         |
| 5  | 5.6          | 5.6  | -2.9 (-1.0)    | 179.3 (-1.2)   | -161.9 (-3.1) | 4.9 (-174.0)   | 108.7 (-139.6) | 0.059       | 0.149         |
| 6  | 6.9          | 3.2  | -2.5 (-0.7)    | -0.9 (+178.7)  | -160.2 (-1.4) | -10.0 (+171.1) | -111.9 (-0.3)  | 0.061       | 0.149         |
| 7  | 7.1          | 3.0  | -2.7 (-0.9)    | -2.0 (+177.6)  | -158.5 (+0.3) | 179.4 (+0.4)   | 109.0 (-139.3) | 0.063       | 0.147         |
| 8  | 8.0          | 2.1  | -3.3 (-1.5)    | 0.9 (-179.6)   | 158.0 (-43.1) | 12.1 (-166.9)  | 108.8 (-139.6) | 0.062       | 0.150         |
| 9  | 9.2          | 1.3  | 157.1 (+158.9) | 177.1 (-3.4)   | -156.4 (+2.5) | 178.7 (-0.3)   | -112.1 (-0.4)  | 0.066       | 0.147         |
| 10 | 9.8          | 1.0  | 157.0 (+158.8) | 175.7 (-4.7)   | -160.3 (-1.5) | 179.4 (+0.4)   | 109.1 (-139.2) | 0.066       | 0.147         |
| 11 | 10.7         | 0.7  | 156.9 (+158.7) | 176.5 (-3.9)   | -159.7 (-0.9) | -11.3 (+169.7) | -111.5 (+0.2)  | 0.065       | 0.149         |
| OO |              |      |                |                |               |                |                |             |               |
| 1  | 0.0          | 64.8 | -3.7           | 179.9          | 154.7         | -179.5         | 3.9            | 0.070       | 0.070         |
| 2  | 2.9          | 20.0 | -2.5 (+1.2)    | 1.8 (-178.1)   | 158.2 (+3.5)  | 1.7 (-178.8)   | 2.7 (-1.1)     | 0.072       | 0.072         |
| 3  | 3.6          | 15.2 | -3.0 (+0.7)    | 179.7 (-0.3)   | 178.1 (+23.3) | 1.1 (-179.4)   | 2.7 (-1.1)     | 0.069       | 0.072         |

Table S2: Thermochemical and geometrical features of the different conformers of compound **2a**, as evaluated at the  $\omega$ B97X-D/6-311G(d)/IEF-PCM(acetonitrile) level of theory: relative Gibbs free energy ( $\Delta G^0$ , kJ mol<sup>-1</sup>), corresponding MB population ( $P$ , %) at 298.15 K, torsional angles ( $\theta$ , °), with the relative difference with respect to the most stable conformer in parentheses) and bond length alternation ( $BLA$ , Å).

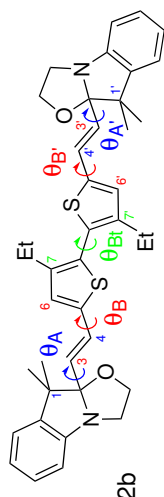[illegible]

Table S3: Thermochemical and geometrical features of the different conformers of compound **2b**, as evaluated at the  $\omega$ B97X-D/6-311G(d)//IEF-PCM(acetonitrile) level of theory: relative Gibbs free energy ( $\Delta G^0$ , kJ mol<sup>-1</sup>), corresponding MB population ( $P$ , %) at 298.15 K, torsional angles ( $\theta$ , °, with the relative difference with respect to the most stable conformer in parentheses) and bond length alternation (BLA, Å).

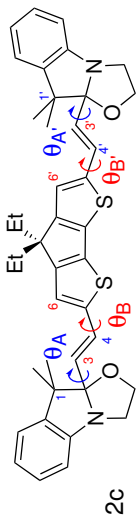

| $\Delta G^0$ | $P$  | $\theta_A$ | $\theta_B$      | $\theta_{B'}$ | $\theta_{A'}$ | $BLA_{2,5}$     | $BLA_{2',5'}$ |
|--------------|------|------------|-----------------|---------------|---------------|-----------------|---------------|
| <b>CC</b>    |      |            |                 |               |               |                 |               |
| 1            | 0.0  | 41.4       | -108.5          | 179.3         | 178.7         | -111.8          | 0.145         |
| 2            | 1.3  | 24.1       | 111.6 (-139.9)  | 179.5 (+0.2)  | 179.4 (+0.7)  | 108.5 (-139.6)  | 0.145         |
| 3            | 1.9  | 19.1       | -108.3 (+0.2)   | 179.5 (+0.2)  | 179.6 (+0.9)  | 108.5 (-139.7)  | 0.145         |
| 4            | 4.5  | 6.6        | -108.7 (-0.2)   | 178.2 (-1.1)  | -2.2 (+179.1) | -112.4 (-0.6)   | 0.145         |
| 5            | 5.3  | 4.9        | -109.2 (-0.7)   | -0.3 (-179.6) | -179.5 (+1.8) | 108.9 (-139.3)  | 0.145         |
| 6            | 7.8  | 1.8        | -108.8 (-0.3)   | 178.0 (-1.3)  | 12.2 (-166.5) | 108.2 (-140.0)  | 0.145         |
| 7            | 8.5  | 1.4        | 112.0 (-139.5)  | 12.7 (-166.6) | 9.4 (-169.3)  | 108.1 (-140.1)  | 0.147         |
| 8            | 9.9  | 0.8        | -109.0 (-0.5)   | -2.5 (+178.2) | 5.8 (-172.9)  | 108.0 (-140.2)  | 0.147         |
| <b>CO</b>    |      |            |                 |               |               |                 |               |
| 1            | 0.0  | 59.9       | 1.9             | 179.5         | -179.9        | 108.9           | 0.146         |
| 2            | 2.9  | 18.5       | 2.4 (+0.5)      | -179.9 (+0.7) | 177.4 (-2.7)  | -112.6 (+138.5) | 0.146         |
| 3            | 4.9  | 8.3        | 2.8 (+0.9)      | -179.6 (+1.0) | -5.6 (+174.3) | -112.8 (+138.3) | 0.148         |
| 4            | 6.5  | 4.3        | 1.6 (-0.3)      | -1.0 (+179.6) | 177.2 (-2.9)  | -112.7 (+138.4) | 0.146         |
| 5            | 7.7  | 2.7        | 2.1 (+0.2)      | 179.6 (+0.2)  | 14.3 (-165.8) | 108.8 (-0.1)    | 0.148         |
| 6            | 8.2  | 2.2        | 2.3 (+0.4)      | 1.0 (-178.5)  | -0.9 (+179.0) | -112.6 (+138.5) | 0.148         |
| 7            | 8.9  | 1.6        | 1.7 (-0.2)      | 0.1 (-179.3)  | 14.7 (-165.4) | 108.6 (-0.3)    | 0.148         |
| 8            | 9.6  | 1.3        | 2.3 (+0.4)      | 0.5 (-178.9)  | 179.9 (-0.2)  | 108.9 (-0.1)    | 0.146         |
| 9            | 10.7 | 0.8        | -165.4 (-167.3) | -177.8 (+2.7) | 177.3 (-2.8)  | -112.6 (+138.5) | 0.146         |
| 10           | 12.4 | 0.4        | -164.8 (-166.7) | -178.0 (+2.5) | 4.1 (-176.0)  | -112.4 (+138.7) | 0.148         |
| <b>OO</b>    |      |            |                 |               |               |                 |               |
| 1            | 0.0  | 66.1       | -3.6            | 177.4         | 179           | 1.2             | 0.062         |
| 2            | 2.8  | 21.1       | -1.5 (+2.2)     | 2.4 (-175.0)  | 1.9 (-177.1)  | 3.0 (+1.8)      | 0.063         |
| 3            | 4.1  | 12.8       | -1.4 (+2.2)     | -178.2 (+4.4) | 0.2 (-178.8)  | 2.5 (+1.3)      | 0.064         |

Table S4: Thermochemical and geometrical features of the different conformers of compound **2c**, as evaluated at the  $\omega$ B97X-D/6-311G(d)/IEF-PCM(acetonitrile) level of theory: relative Gibbs free energy ( $\Delta G^0$ , kJ mol<sup>-1</sup>), corresponding MB population ( $P$ , %) at 298.15 K, torsional angles ( $\theta$ , °, with the relative difference with respect to the most stable conformer in parentheses) and bond length alternation ( $BLA$ , Å).

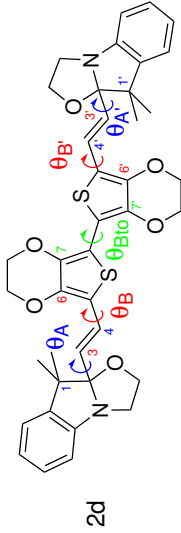

| $\Delta G^0$ | $P$  | $\theta_A$ | $\theta_B$     | $\theta_{Bto}$ | $\theta_{B'}$ | $\theta_{A'}$ | $BLA_{2,5}$    | $BLA_{2',5'}$ |
|--------------|------|------------|----------------|----------------|---------------|---------------|----------------|---------------|
| <b>CC</b>    |      |            |                |                |               |               |                |               |
| 1            | 0.0  | 82.1       | 61.2           | -179           | 179.1         | 180           | 109.3          | 0.142         |
| 2            | 3.8  | 17.9       | 73.2 (+12.1)   | 175.7 (-5.3)   | 178.5 (-0.6)  | 177.7 (-2.2)  | 108.5 (-0.8)   | 0.142         |
| <b>CO</b>    |      |            |                |                |               |               |                |               |
| 1            | 0.0  | 66.3       | -5             | -178.9         | -179.9        | 177.4         | -111.1         | 0.036         |
| 2            | 3.7  | 14.7       | -5.1 (-0.1)    | -179.7 (-0.8)  | 179.4 (-0.7)  | 0.9 (-176.5)  | -112.8 (-1.8)  | 0.036         |
| 3            | 3.8  | 14.1       | -7.5 (-2.5)    | 1.2 (-179.9)   | 178.6 (-1.5)  | 174.9 (-2.5)  | -112.9 (-1.9)  | 0.040         |
| 4            | 8.2  | 2.5        | -5.8 (-0.8)    | -179.5 (-0.7)  | 179.9 (-0.2)  | 178.1 (+0.7)  | 109.0 (-140.0) | 0.037         |
| 5            | 8.2  | 2.4        | -6.1 (-1.1)    | -179.7 (-0.8)  | 179.4 (-0.7)  | 8.8 (-168.6)  | 109.4 (-139.6) | 0.035         |
| <b>OO</b>    |      |            |                |                |               |               |                |               |
| 1            | 0.0  | 82.9       | -30.7          | 179.7          | 179.5         | -179          | 7.2            | 0.055         |
| 2            | 5.4  | 9.4        | -31.3 (-0.6)   | 3.0 (-176.7)   | 179.6 (+0.1)  | 2.4 (-178.6)  | 6.4 (-0.7)     | 0.055         |
| 3            | 6.1  | 7.0        | -29.1 (+1.6)   | -178.8 (+1.5)  | -179.7 (+0.8) | 2.9 (-178.1)  | 7.2 (+0.0)     | 0.057         |
| 4            | 11.8 | 0.7        | 128.0 (+158.7) | 176.0 (-3.7)   | 179.5 (+0.0)  | -179.7 (-0.7) | 6.5 (-0.6)     | 0.053         |

Table S5: Thermochemical and geometrical features of the different conformers of compound **2d**, as evaluated at the  $\omega$ B97X-D/6-311G(d)/IEF-PCM(acetonitrile) level of theory: relative Gibbs free energy ( $\Delta G^0$ , kJ mol<sup>-1</sup>), corresponding MB population ( $P$ , %) at 298.15 K, torsional angles ( $\theta$ , °), with the relative difference with respect to the most stable conformer in parentheses) and bond length alternation ( $BLA$ , Å).

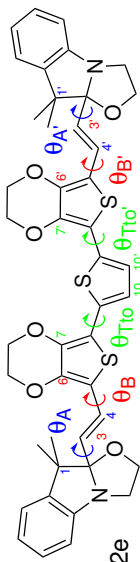

| $\Delta G^0$ | $P$ | $\theta_A$ | $\theta_B$      | $\theta_{TtO}$ | $\theta_{TtO'}$ | $\theta_{B'}$ | $\theta_{A'}$  | $BLA_{2,5}$    | $BLA_{2,5'}$ |
|--------------|-----|------------|-----------------|----------------|-----------------|---------------|----------------|----------------|--------------|
| CC           |     |            |                 |                |                 |               |                |                |              |
| 1            | 0.0 | 19.3       | 112.5           | -176.8         | -177.8          | -179.3        | 0.2            | -112.9         | 0.142        |
| 2            | 0.9 | 13.3       | 112.0 (-0.5)    | -177.7 (-0.9)  | -178.6 (-0.8)   | 15.9 (-164.8) | 176.5 (+176.3) | -112.3 (+0.7)  | 0.142        |
| 3            | 1.0 | 12.8       | 112.3 (-0.2)    | -176.9 (-0.1)  | 179.6 (-2.6)    | 178.9 (-1.8)  | 178.7 (+178.5) | 108.7 (-138.3) | 0.142        |
| 4            | 1.6 | 10.0       | 113.0 (+0.5)    | -0.3 (+176.5)  | -178.2 (-0.4)   | 178.2 (-2.5)  | 0.3 (+0.0)     | -113.0 (-0.1)  | 0.142        |
| 5            | 1.8 | 9.2        | 111.9 (-0.5)    | -177.1 (-0.3)  | 178.9 (-3.3)    | 177.8 (-2.9)  | 7.8 (+7.5)     | 109.0 (-138.0) | 0.142        |
| 6            | 1.9 | 8.9        | 112.1 (-0.4)    | -177.1 (-0.3)  | -16.8 (+161.0)  | 16.8 (-163.9) | 177.1 (+176.9) | -112.1 (+0.8)  | 0.142        |
| 7            | 2.0 | 8.7        | 111.9 (-0.5)    | -176.5 (+0.2)  | 179.1 (-3.1)    | 16.4 (-164.3) | -1.0 (-1.2)    | -113.6 (-0.7)  | 0.142        |
| 8            | 2.6 | 6.8        | 111.9 (-0.6)    | -177.3 (-0.5)  | 179.8 (-2.5)    | 15.5 (-165.2) | 177.7 (+177.5) | 108.3 (-138.8) | 0.143        |
| 9            | 3.0 | 5.6        | 113.5 (+1.0)    | 0.7 (+177.4)   | -174.8 (+2.9)   | 19.2 (-161.5) | 179.8 (+179.6) | 109.1 (-138.0) | 0.143        |
| 10           | 5.0 | 2.5        | -108.6 (+138.9) | -177.6 (-0.8)  | -18.2 (+159.6)  | 18.1 (-162.6) | 177.7 (+177.4) | 108.6 (-138.5) | 0.143        |
| 11           | 6.0 | 1.7        | -109.6 (+137.9) | -10.5 (+166.2) | -178.3 (-0.5)   | 15.1 (-165.6) | 175.4 (+175.2) | -112.6 (+0.4)  | 0.142        |
| 12           | 6.9 | 1.2        | 112.1 (-0.4)    | -177.1 (-0.3)  | -179.3 (-1.5)   | 18.4 (-162.3) | 7.7 (+7.4)     | 109.0 (-138.0) | 0.142        |
| CO           |     |            |                 |                |                 |               |                |                |              |
| 1            | 0.0 | 45.8       | -111.9          | 177.3          | -177.9          | 179.3         | -179.3         | 6.8            | 0.143        |
| 2            | 3.4 | 11.7       | -113.2 (-1.3)   | -1.0 (-178.3)  | 178.3 (-3.8)    | 178.2 (-1.1)  | -179.7 (-0.4)  | 5.4 (-1.4)     | 0.142        |
| 3            | 3.6 | 10.8       | -112.2 (-0.3)   | 176.4 (-0.9)   | 14.1 (-168.1)   | 179.5 (+0.2)  | -179.7 (-0.4)  | 5.3 (-1.5)     | 0.143        |
| 4            | 3.8 | 10.0       | 108.2 (-139.9)  | 177.6 (+0.4)   | 178.4 (-3.7)    | 177.1 (-2.2)  | -178.4 (+0.9)  | 6.6 (-0.2)     | 0.143        |
| 5            | 4.2 | 8.5        | 108.9 (-139.2)  | 179.0 (+1.7)   | -179.1 (-1.2)   | 10.8 (-168.5) | -179.1 (+0.2)  | 6.4 (-0.4)     | 0.143        |
| 6            | 6.2 | 3.7        | 109.1 (-139.0)  | 8.7 (-168.5)   | -179.4 (-1.6)   | 178.2 (-1.1)  | -179.9 (-0.6)  | 6.5 (-0.3)     | 0.142        |
| 7            | 7.2 | 2.5        | -113.0 (-1.2)   | 0.1 (-177.1)   | 179.1 (-3.0)    | 7.2 (-172.1)  | -179.5 (-0.2)  | 6.7 (-0.1)     | 0.142        |
| 8            | 7.6 | 2.1        | -111.7 (+0.1)   | 176.9 (-0.4)   | 11.7 (-170.4)   | 6.5 (-172.8)  | -179.8 (-0.4)  | 6.2 (-0.6)     | 0.143        |
| 9            | 7.8 | 1.9        | -113.9 (-2.0)   | -0.8 (-178.0)  | 14.5 (-167.6)   | 178.5 (-0.8)  | -179.2 (+0.1)  | 6.3 (-0.5)     | 0.142        |
| 10           | 8.4 | 1.5        | 108.8 (-139.4)  | 177.9 (+0.7)   | 8.3 (-173.8)    | 175.0 (-4.3)  | -179.8 (-0.5)  | 6.2 (-0.6)     | 0.143        |
| 11           | 8.6 | 1.4        | 109.0 (-139.1)  | 8.2 (-169.0)   | 14.0 (-168.2)   | 178.7 (-0.6)  | -179.4 (-0.0)  | 6.0 (-0.8)     | 0.142        |
| OO           |     |            |                 |                |                 |               |                |                |              |
| 1            | 0.0 | 80.9       | -6.3            | 179.2          | 179.3           | 176.5         | 179.1          | -53.4          | 0.046        |
| 2            | 4.0 | 16.4       | -6.2 (+0.1)     | 179.7 (+0.5)   | -178.5 (+2.1)   | 13.1 (-163.3) | -179.6 (+1.2)  | -52.8 (+0.6)   | 0.046        |
| 3            | 8.4 | 2.7        | -6.6 (-0.2)     | 179.2 (-0.0)   | 179.6 (+0.2)    | 10.9 (-165.5) | -176.1 (+4.8)  | 152.5 (-154.1) | 0.051        |

Table S6: Thermochemical and geometrical features of the different conformers of compound **2e**, as evaluated at the  $\omega$ B97X-D/6-311G(d)/IEF-PCM(acetonitrile) level of theory: relative Gibbs free energy ( $\Delta G^0$ , kJ mol<sup>-1</sup>), corresponding MB population ( $P$ , %) at 298.15 K, torsional angles ( $\theta$ , °), with the relative difference with respect to the most stable conformer in parentheses) and bond length alternation ( $BLA$ , Å).

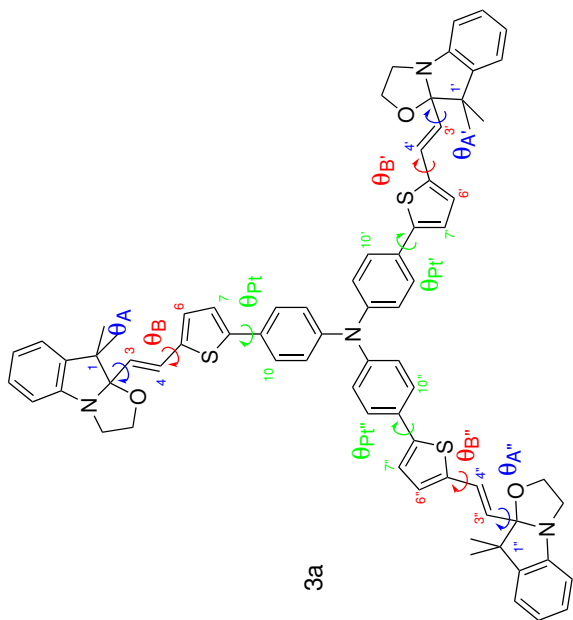

3a

| $\Delta G^0$ | $P$  | $\theta_A$ | $\theta_B$      | $\theta_{Pt}$  | $\theta_{A'}$  | $\theta_{B'}$   | $\theta_{Pt'}$ | $\theta_{A''}$ | $\theta_{B''}$  | $\theta_{Pt''}$ |
|--------------|------|------------|-----------------|----------------|----------------|-----------------|----------------|----------------|-----------------|-----------------|
| CCC          |      |            |                 |                |                |                 |                |                |                 |                 |
| 1            | 0.0  | 32.7       | 111.3           | 178.6          | 29.8           | 112.3           | 179.8          | 31.2           | 112             | 148             |
| 2            | 1.3  | 19.1       | 112.5 (+1.1)    | -177.4 (+4.0)  | 149.0 (+119.2) | 112.4 (+0.1)    | -177.5 (+2.7)  | 148.9 (+117.6) | 112.3 (+0.3)    | -178.5 (+0.7)   |
| 3            | 2.6  | 11.5       | 112.2 (+0.9)    | -177.8 (+3.6)  | 148.5 (+118.7) | -109.0 (+138.7) | -179.7 (+0.5)  | 148.2 (+117.0) | -108.8 (+139.2) | -178.9 (-0.4)   |
| 4            | 2.7  | 11.0       | 112.2 (+0.9)    | -177.6 (+3.8)  | 149.1 (+119.3) | -109.1 (+138.6) | -179.4 (+0.8)  | 148.2 (+116.9) | 112.0 (+0.0)    | -178.2 (+0.3)   |
| 5            | 4.6  | 5.0        | 111.8 (+0.5)    | -178.1 (+3.3)  | 148.6 (+118.8) | -108.9 (+138.9) | -179.4 (+0.8)  | 148.7 (+117.5) | -109.1 (+138.8) | 8.9 (-172.5)    |
| 6            | 5.4  | 3.8        | 111.8 (+0.5)    | 179.3 (+0.7)   | 30.1 (+0.4)    | -109.3 (+138.4) | 177.3 (-2.5)   | 29.9 (-1.3)    | -109.1 (+138.9) | -179.5 (-0.9)   |
| 7            | 5.5  | 3.5        | -108.7 (+140.0) | -179.0 (+2.4)  | 148.7 (+118.9) | -109.1 (+138.6) | 179.7 (-0.1)   | 148.5 (+117.2) | -108.9 (+139.1) | -179.4 (-0.9)   |
| 8            | 6.4  | 2.5        | 112.7 (+1.4)    | -179.1 (+2.3)  | 31.9 (+2.1)    | -108.7 (+139.0) | 177.8 (-2.0)   | 30.6 (-0.6)    | 111.9 (-0.1)    | -177.9 (+0.6)   |
| 9            | 6.4  | 2.4        | 112.2 (+0.9)    | 12.6 (-166.1)  | 148.1 (+118.4) | -108.4 (+139.3) | -178.1 (+2.1)  | 149.7 (+118.5) | -108.7 (+139.3) | -179.3 (-0.8)   |
| 10           | 6.6  | 2.3        | 112.2 (+0.9)    | 12.5 (-166.1)  | 31.4 (+1.7)    | 112.9 (+0.6)    | -179.6 (+0.6)  | 31.4 (+0.2)    | 112.6 (+0.6)    | -177.0 (+1.5)   |
| 11           | 7.2  | 1.8        | 112.8 (+1.5)    | -179.0 (+2.4)  | 31.4 (+1.6)    | -108.6 (+139.1) | 178.3 (-1.5)   | 30.4 (-0.9)    | -109.3 (+138.7) | 4.0 (-177.4)    |
| 12           | 7.4  | 1.7        | -108.7 (+140.0) | 178.0 (-0.6)   | 30.8 (+1.1)    | -108.6 (+139.1) | 179.1 (-0.7)   | 31.8 (+0.6)    | -109.2 (+138.7) | 179.7 (-1.8)    |
| 13           | 10.4 | 0.5        | 158.3 (+47.0)   | -100.1 (+81.3) | 30.9 (+1.2)    | -108.7 (+139.0) | -12.1 (+168.1) | 30.8 (-0.5)    | -114.9 (+133.1) | -78.7 (+99.8)   |
| 14           | 10.5 | 0.5        | 112.3 (+0.9)    | 3.3 (-175.3)   | 30.8 (+1.0)    | -108.6 (+139.2) | 178.3 (-1.5)   | 30.9 (-0.3)    | 112.5 (+0.4)    | -177.3 (+1.2)   |
| 15           | 10.6 | 0.5        | 111.8 (+0.5)    | 4.6 (-174.1)   | 30.9 (+1.1)    | -109.0 (+138.7) | 177.7 (-2.1)   | 30.4 (-0.8)    | -108.7 (+139.3) | -179.1 (-0.6)   |
| 16           | 10.6 | 0.5        | 112.0 (+0.7)    | 9.6 (-169.0)   | 30.4 (+0.6)    | -108.4 (+139.3) | -12.0 (+168.2) | 30.8 (-0.4)    | 112.9 (+0.9)    | -179.2 (-0.7)   |
| 17           | 11.0 | 0.4        | 111.7 (+0.4)    | 11.4 (-167.2)  | 31.0 (+1.3)    | -108.4 (+139.3) | 179.1 (-0.7)   | 31.0 (-0.2)    | 111.9 (-0.1)    | 14.7 (-166.7)   |

Table S7: Thermochemical and geometrical features of the different conformers of the closed form of compound **3a**, as evaluated at the  $\omega$ B97X-D/6-311G(d)/IEF-PCM(acetonitrile) level of theory: relative Gibbs free energy ( $\Delta G^0$ , kJ mol<sup>-1</sup>), corresponding MB population ( $P$ , %) at 298.15 K and torsional angles ( $\theta$ , °), with the relative difference with respect to the most stable conformer in parentheses).



| $\Delta G^0$ | $P$  | $\theta_A$ | $\theta_B$   | $\theta_{Pt}$ | $\theta_{A'}$ | $\theta_{B'}$   | $\theta_{Pt'}$ | $\theta_{A''}$ | $\theta_{B''}$ | $\theta_{Pt''}$ |                |
|--------------|------|------------|--------------|---------------|---------------|-----------------|----------------|----------------|----------------|-----------------|----------------|
| CCO          |      |            |              |               |               |                 |                |                |                |                 |                |
| 1            | 0.0  | 37.6       | 113.2        | -176.5        | -29.6         | 3.3             | -0.6           | 28.8           | 111.9          | -178.2          | 148.2          |
| 2            | 0.6  | 29.4       | 112.6 (-0.6) | -179.3 (-2.9) | 31.2 (+60.8)  | 2.2 (-1.1)      | -1.2 (-0.6)    | 28.4 (-0.4)    | 113.1 (+1.2)   | -179.0 (-0.8)   | -147.8 (+63.9) |
| 3            | 3.7  | 8.5        | 112.7 (-0.5) | -177.3 (-0.8) | -30.0 (-0.4)  | 2.0 (-1.3)      | 0.5 (+1.0)     | -28.3 (-57.1)  | 111.8 (-0.1)   | -178.3 (-0.1)   | 148.4 (+0.1)   |
| 4            | 4.3  | 6.7        | 112.1 (-1.1) | 179.6 (-3.9)  | 30.9 (+60.5)  | 1.9 (-1.4)      | 0.9 (+1.5)     | -29.1 (-57.9)  | 112.5 (+0.6)   | -179.4 (-1.2)   | -148.4 (+63.4) |
| 5            | 4.4  | 6.4        | 113.0 (-0.2) | -178.5 (-2.1) | 32.0 (+61.6)  | 3.8 (+0.5)      | -0.3 (+0.3)    | 30.3 (+1.5)    | 111.7 (-0.2)   | -178.6 (-0.4)   | 147.8 (-0.4)   |
| 6            | 5.5  | 4.1        | 112.5 (-0.7) | 179.8 (-3.8)  | 30.7 (+60.3)  | 2.8 (-0.5)      | 1.5 (+2.1)     | -27.7 (-56.5)  | 112.0 (+0.1)   | -178.1 (+0.1)   | 147.9 (-0.4)   |
| 7            | 6.6  | 2.7        | 111.9 (-1.3) | -178.9 (-2.4) | -32.0 (-2.4)  | -163.5 (-166.8) | 3.2 (+3.8)     | -30.3 (-59.1)  | 112.2 (+0.2)   | -177.9 (+0.3)   | 148.3 (+0.1)   |
| 8            | 7.6  | 1.8        | 112.5 (-0.7) | -177.1 (-0.6) | -30.8 (-1.3)  | -161.5 (-164.9) | 2.0 (+2.5)     | 30.0 (+1.2)    | 112.6 (+0.6)   | -179.8 (-1.6)   | -148.8 (+62.9) |
| 9            | 7.6  | 1.8        | 112.5 (-0.7) | -177.1 (-0.6) | -30.8 (-1.3)  | -161.5 (-164.9) | 2.0 (+2.5)     | 30.0 (+1.2)    | 112.6 (+0.6)   | -179.8 (-1.6)   | -148.8 (+62.9) |
| 10           | 10.7 | 0.5        | 112.2 (-1.0) | 179.8 (-3.8)  | 31.0 (+60.6)  | -161.5 (-164.8) | 5.6 (+6.2)     | -27.5 (-56.4)  | 112.5 (+0.5)   | -179.7 (-1.5)   | -148.4 (+63.4) |
| 11           | 11.5 | 0.4        | 112.6 (-0.6) | -177.1 (-0.7) | -30.2 (-0.6)  | -160.1 (-163.5) | 3.4 (+4.0)     | 29.7 (+0.9)    | 112.3 (+0.4)   | -177.9 (+0.3)   | 147.9 (-0.3)   |
| 12           | 11.8 | 0.3        | 112.6 (-0.6) | -177.3 (-0.8) | -30.6 (-1.0)  | -162.0 (-165.3) | 5.3 (+5.9)     | -28.9 (-57.7)  | 112.2 (+0.3)   | 179.9 (-1.9)    | -148.6 (+63.1) |
| COO          |      |            |              |               |               |                 |                |                |                |                 |                |
| 1            | 0.0  | 28.8       | 3.2          | -0.5          | 29.4          | 2.1             | -1.2           | 28.6           | 112.8          | -179.5          | 31.4           |
| 2            | 0.9  | 19.9       | 2.3 (-0.9)   | 2.5 (+3.0)    | -29.4 (-58.8) | 2.4 (+0.4)      | 1.7 (+2.9)     | -29.9 (-58.5)  | 111.6 (-1.2)   | 178.3 (-2.2)    | 30.0 (-1.3)    |
| 3            | 1.0  | 19.2       | 2.3 (-0.9)   | -2.1 (-1.5)   | 28.4 (-1.0)   | 2.5 (+0.4)      | -2.1 (-0.9)    | 29.0 (+0.4)    | 112.5 (-0.4)   | -177.9 (+1.6)   | -31.2 (-62.6)  |
| 4            | 1.6  | 15.0       | 3.6 (+0.4)   | 1.4 (+1.9)    | -29.3 (-58.8) | 3.4 (+1.3)      | 1.9 (+3.1)     | -27.2 (-55.8)  | 112.0 (-0.8)   | -178.8 (+0.7)   | -31.5 (-62.9)  |
| 5            | 2.1  | 12.6       | 2.8 (-0.4)   | -1.8 (-1.3)   | 29.2 (-0.2)   | 3.1 (+1.0)      | 3.5 (+4.7)     | -28.6 (-57.2)  | 113.0 (+0.2)   | -178.9 (+0.6)   | 32.1 (+0.7)    |
| 6            | 4.6  | 4.5        | 2.4 (-0.8)   | -1.4 (-0.9)   | 28.9 (-0.5)   | 3.0 (+1.0)      | 1.8 (+3.0)     | -28.1 (-56.7)  | 112.4 (-0.4)   | -177.1 (+2.4)   | -31.0 (-62.4)  |
| OOO          |      |            |              |               |               |                 |                |                |                |                 |                |
| 1            | 0.0  | 51.2       | -2.6         | 1.9           | -30.8         | -2.6            | 0.2            | -29.5          | -2.8           | -2.9            | 28             |
| 2            | 1.4  | 29.1       | -3.5 (-0.9)  | -2.7 (-4.6)   | 28.9 (+59.7)  | -2.4 (+0.2)     | -0.5 (-0.7)    | 30.3 (+59.7)   | -2.4 (+0.4)    | -0.8 (+2.1)     | 30.2 (+2.2)    |
| 3            | 4.5  | 8.3        | -3.7 (-1.1)  | 0.8 (-1.1)    | -30.9 (-0.1)  | -3.0 (-0.4)     | -2.1 (-2.4)    | 28.7 (+58.2)   | -2.6 (+0.2)    | -2.0 (+0.9)     | 28.8 (+0.9)    |
| 4            | 5.9  | 4.8        | -3.8 (-1.2)  | 0.5 (-1.4)    | -31.3 (-0.5)  | -2.8 (-0.2)     | 1.9 (+1.7)     | -30.2 (-0.7)   | -3.2 (-0.4)    | 0.7 (+3.6)      | -30.8 (-58.8)  |
| 5            | 6.4  | 3.8        | -3.6 (-1.0)  | -2.6 (-4.5)   | 29.1 (+59.9)  | 161.7 (+164.4)  | -5.3 (-5.5)    | 29.9 (+59.4)   | -2.4 (+0.4)    | 2.6 (+5.5)      | -28.5 (-56.4)  |
| 6            | 8.2  | 1.9        | -2.0 (+0.6)  | 0.0 (-1.8)    | 30.6 (+61.4)  | -3.1 (-0.4)     | -2.2 (-2.4)    | 28.7 (+58.2)   | 162.3 (+165.1) | -1.5 (+1.4)     | -29.1 (-57.1)  |
| 7            | 9.9  | 1.0        | -1.6 (+1.1)  | 0.8 (-1.1)    | 31.2 (+62.0)  | -2.6 (+0.0)     | -0.7 (-0.9)    | 30.3 (+59.8)   | 163.6 (+166.4) | -4.3 (-1.4)     | 30.2 (+2.2)    |

Table S8: Thermochemical and geometrical features of the different conformers of the open forms of compound **3a**, as evaluated at the  $\omega$ B97X-D/6-311G(d)/IEF-PCM(acetonitrile) level of theory: relative Gibbs free energy ( $\Delta G^0$ , kJ mol<sup>-1</sup>), corresponding MB population ( $P$ , %) at 298.15 K and torsional angles ( $\theta$ , °), with the relative difference with respect to the most stable conformer in parentheses).

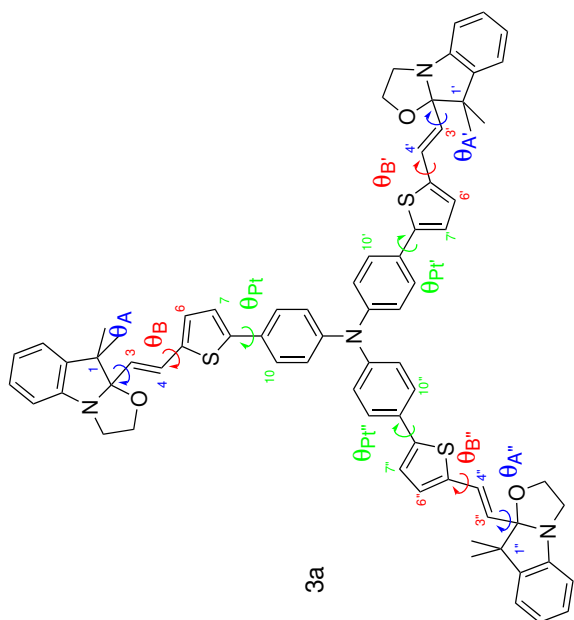

|    | CCC                |                      |                        | CCO                |                      |                        | COO                |                      |                        | OOO                |                      |                        |
|----|--------------------|----------------------|------------------------|--------------------|----------------------|------------------------|--------------------|----------------------|------------------------|--------------------|----------------------|------------------------|
|    | BLA <sub>2,5</sub> | BLA <sub>2',5'</sub> | BLA <sub>2'',5''</sub> | BLA <sub>2,5</sub> | BLA <sub>2',5'</sub> | BLA <sub>2'',5''</sub> | BLA <sub>2,5</sub> | BLA <sub>2',5'</sub> | BLA <sub>2'',5''</sub> | BLA <sub>2,5</sub> | BLA <sub>2',5'</sub> | BLA <sub>2'',5''</sub> |
| 1  | 0.147              | 0.147                | 0.147                  | 0.147              | 0.059                | 0.147                  | 0.061              | 0.061                | 0.147                  | 0.062              | 0.062                | 0.062                  |
| 2  | 0.147              | 0.147                | 0.147                  | 0.147              | 0.059                | 0.147                  | 0.061              | 0.061                | 0.147                  | 0.062              | 0.062                | 0.062                  |
| 3  | 0.147              | 0.147                | 0.147                  | 0.147              | 0.059                | 0.147                  | 0.061              | 0.061                | 0.147                  | 0.063              | 0.062                | 0.062                  |
| 4  | 0.147              | 0.147                | 0.147                  | 0.147              | 0.060                | 0.147                  | 0.061              | 0.061                | 0.147                  | 0.063              | 0.062                | 0.063                  |
| 5  | 0.146              | 0.147                | 0.147                  | 0.147              | 0.059                | 0.147                  | 0.061              | 0.061                | 0.147                  | 0.062              | 0.063                | 0.062                  |
| 6  | 0.147              | 0.147                | 0.147                  | 0.147              | 0.059                | 0.147                  | 0.061              | 0.061                | 0.147                  | 0.062              | 0.062                | 0.063                  |
| 7  | 0.147              | 0.147                | 0.147                  | 0.147              | 0.060                | 0.147                  | 0.061              | 0.061                | 0.147                  | 0.062              | 0.062                | 0.062                  |
| 8  | 0.147              | 0.147                | 0.147                  | 0.147              | 0.061                | 0.147                  | 0.061              | 0.061                | 0.147                  | 0.062              | 0.062                | 0.062                  |
| 9  | 0.149              | 0.147                | 0.147                  | 0.147              | 0.061                | 0.147                  | 0.061              | 0.061                | 0.147                  |                    |                      |                        |
| 10 | 0.149              | 0.147                | 0.147                  | 0.147              | 0.060                | 0.147                  | 0.060              | 0.060                | 0.147                  |                    |                      |                        |
| 11 | 0.147              | 0.147                | 0.147                  | 0.147              | 0.061                | 0.147                  | 0.061              | 0.061                | 0.147                  |                    |                      |                        |
| 12 | 0.147              | 0.147                | 0.147                  | 0.147              | 0.060                | 0.147                  | 0.060              | 0.060                | 0.147                  |                    |                      |                        |
| 13 | 0.150              | 0.149                | 0.149                  | 0.150              |                      |                        |                    |                      |                        |                    |                      |                        |
| 14 | 0.149              | 0.147                | 0.147                  | 0.147              |                      |                        |                    |                      |                        |                    |                      |                        |
| 15 | 0.149              | 0.147                | 0.147                  | 0.147              |                      |                        |                    |                      |                        |                    |                      |                        |
| 16 | 0.149              | 0.149                | 0.149                  | 0.147              |                      |                        |                    |                      |                        |                    |                      |                        |
| 17 | 0.149              | 0.147                | 0.147                  | 0.149              |                      |                        |                    |                      |                        |                    |                      |                        |
| 18 | 0.149              | 0.147                | 0.147                  | 0.147              |                      |                        |                    |                      |                        |                    |                      |                        |
| 19 | 0.149              | 0.149                | 0.149                  | 0.149              |                      |                        |                    |                      |                        |                    |                      |                        |
| 20 | 0.149              | 0.147                | 0.147                  | 0.147              |                      |                        |                    |                      |                        |                    |                      |                        |

Table S9: Bond length alternation (BLA, Å) of the different conformers of compound **3a**, as evaluated at the  $\omega$ B97X-D/6-311G(d)/IEF-PCM(acetonitrile) level of theory.

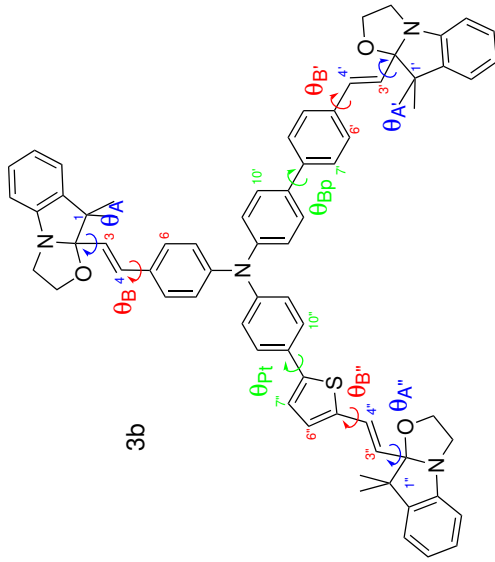

**3b**

| $\Delta G^0$                | $P$ | $\theta_A$ | $\theta_B$     | $\theta_{A'}$ | $\theta_{B'}$  | $\theta_{B'p'}$ | $\theta_{A''}$ | $\theta_{B''}$ | $\theta_{PhTh}$ | BLA <sub>2,5</sub> | BLA <sub>2',5'</sub> | BLA <sub>2'',5''</sub> |
|-----------------------------|-----|------------|----------------|---------------|----------------|-----------------|----------------|----------------|-----------------|--------------------|----------------------|------------------------|
| CCC [Ph(C)-BiPh(C)-PhTh(C)] |     |            |                |               |                |                 |                |                |                 |                    |                      |                        |
| 1                           | 0.0 | 28.6       | -111.2         | 172.1         | -112.6         | 166.7           | -140.7         | -112.5         | 179.7           | 148.300            | 0.156                | 0.157                  |
| 2                           | 1.2 | 17.3       | 109.3 (-139.5) | 174.5 (+2.4)  | 109.5 (-137.9) | -168.4 (+24.9)  | -140.4 (+0.3)  | -113.0 (-0.5)  | 178.6 (-1.1)    | 147.8 (-0.5)       | 0.156                | 0.147                  |
| 3                           | 1.5 | 15.8       | -111.8 (-0.6)  | 167.3 (-4.8)  | -112.0 (+0.7)  | 171.0 (+4.3)    | -140.4 (+0.4)  | 108.3 (-139.2) | -179.9 (+0.4)   | 147.6 (-0.7)       | 0.156                | 0.147                  |
| 4                           | 1.6 | 14.9       | -111.9 (-0.7)  | 168.8 (-3.3)  | 109.3 (-138.0) | -175.7 (+17.6)  | -140.8 (-0.1)  | 109.2 (-138.2) | -177.6 (+2.7)   | 149.2 (+0.9)       | 0.156                | 0.147                  |
| 5                           | 2.2 | 11.9       | -111.6 (-0.4)  | 169.4 (-2.7)  | 109.2 (-138.1) | -172.8 (+20.5)  | -140.7 (+0.0)  | -112.2 (+0.3)  | -179.7 (+0.6)   | 148.8 (+0.5)       | 0.156                | 0.147                  |
| 6                           | 3.1 | 8.3        | 109.5 (-139.3) | 175.9 (+3.8)  | -111.8 (+0.8)  | 169.3 (+2.5)    | -140.3 (+0.5)  | 108.5 (-138.9) | -179.2 (+1.1)   | 148.5 (+0.2)       | 0.156                | 0.147                  |
| 7                           | 5.4 | 3.3        | -112.2 (-0.9)  | 166.9 (-5.1)  | -112.5 (+0.2)  | 167.8 (+1.1)    | -140.5 (+0.2)  | -111.6 (+0.9)  | 10.9 (-168.7)   | 148.9 (+0.6)       | 0.156                | 0.149                  |

Table S10: Thermochemical and geometrical features of the different conformers of the closed form of compound **3b**, as evaluated at the  $\omega$ B97X-D/6-311G(d)/IEF-PCM(acetonitrile) level of theory: relative Gibbs free energy ( $\Delta G^0$ , kJ mol<sup>-1</sup>), corresponding MB population ( $P$ , %) at 298.15 K, torsional angles ( $\theta$ , °, with the relative difference with respect to the most stable conformer in parentheses) and bond length alternation (BLA, Å).

| $\Delta G^0$                | $P$  | $\theta_A$ | $\theta_B$      | $\theta_{A'}$ | $\theta_{B'}$  | CCO [Ph(C)-BiPh(C)-PhTh(O)] |               |                 |                |              | $\theta_{B''}$ | $\theta_{Pt}$ | BLA <sub>2,5</sub> | BLA <sub>2',5'</sub> | BLA <sub>2'',5''</sub> |
|-----------------------------|------|------------|-----------------|---------------|----------------|-----------------------------|---------------|-----------------|----------------|--------------|----------------|---------------|--------------------|----------------------|------------------------|
| 1                           | 0.0  | 46.3       | -111.7          | 168.6         | -112.2         | 170.1                       | -140.1        | 28              | -178.2         | 153          | -177.8 (+0.4)  | 154.6 (+1.5)  | 0.157              | 0.157                | 0.056                  |
| 2                           | 1.0  | 31.5       | 109.6 (-138.7)  | 180.0 (+11.3) | -112.1 (+0.1)  | 168.1 (-2.0)                | -140.0 (+0.0) | 28.4 (+0.4)     | -177.8 (+0.4)  | 154.6 (+1.5) | -178.0 (+0.2)  | 153.5 (+0.5)  | 0.157              | 0.157                | 0.056                  |
| 3                           | 3.3  | 12.4       | -112.0 (-0.3)   | 167.3 (-1.3)  | 109.1 (-138.7) | -176.8 (+13.1)              | -140.5 (-0.4) | 28.0 (+0.0)     | -178.0 (+0.2)  | 153.5 (+0.5) | -179.4 (-1.2)  | 151.7 (-1.4)  | 0.157              | 0.157                | 0.056                  |
| 4                           | 4.0  | 9.1        | 109.7 (-138.6)  | 176.9 (+8.2)  | 109.4 (-138.4) | -170.0 (+19.9)              | -140.4 (-0.3) | 26.1 (-1.8)     | -179.4 (-1.2)  | 151.7 (-1.4) | 1.9 (-179.9)   | 151.2 (-1.8)  | 0.156              | 0.157                | 0.059                  |
| 5                           | 10.3 | 0.7        | -112.9 (-1.3)   | 164.7 (-4.0)  | -111.7 (+0.4)  | 169.4 (-0.7)                | -139.9 (+0.2) | 27.6 (-0.3)     |                |              |                |               |                    |                      |                        |
| COC [Ph(C)-BiPh(O)-PhTh(C)] |      |            |                 |               |                |                             |               |                 |                |              |                |               |                    |                      |                        |
| 1                           | 0.0  | 46.8       | 109.3           | -175.4        | 1.5            | 177.3                       | -143.2        | 109.1           | -177.9         | 148.9        | -179.6 (-1.7)  | 148.7 (-0.2)  | 0.156              | 0.084                | 0.147                  |
| 2                           | 2.4  | 18.0       | 109.6 (+0.3)    | 173.9 (-10.6) | 1.9 (+0.5)     | 176.4 (-0.9)                | -142.7 (+0.5) | -112.3 (+138.6) | -179.6 (-1.7)  | 148.7 (-0.2) | -176.6 (+1.3)  | 149.6 (+0.8)  | 0.156              | 0.085                | 0.147                  |
| 3                           | 2.5  | 17.0       | -112.4 (+138.3) | 166.8 (-17.7) | 4.0 (+2.5)     | -177.1 (+5.6)               | -140.7 (+2.5) | 109.3 (+0.1)    | -176.6 (+1.3)  | 149.6 (+0.8) | 179.3 (-2.7)   | 147.9 (-0.9)  | 0.156              | 0.085                | 0.147                  |
| 4                           | 2.6  | 16.6       | -112.7 (+138.0) | 167.4 (-17.2) | 2.7 (+1.3)     | 177.3 (-0.0)                | -142.6 (+0.6) | -112.7 (+138.2) | 179.3 (-2.7)   | 147.9 (-0.9) | -9.1 (+168.8)  | 148.8 (-0.1)  | 0.156              | 0.085                | 0.149                  |
| 5                           | 8.2  | 1.7        | -112.3 (+138.4) | 166.9 (-17.7) | 3.5 (+2.0)     | -177.4 (+5.3)               | -141.3 (+2.0) | -112.0 (+138.8) |                |              |                |               |                    |                      |                        |
| OCC [Ph(O)-BiPh(C)-PhTh(C)] |      |            |                 |               |                |                             |               |                 |                |              |                |               |                    |                      |                        |
| 1                           | 0.0  | 62.1       | 1.8             | 177.9         | -112           | 166.9                       | -140.1        | -111.9          | -179           | 149.2        | -179.7 (-0.7)  | 149.2 (+0.0)  | 0.064              | 0.157                | 0.147                  |
| 2                           | 3.9  | 12.7       | 4.0 (+2.2)      | -178.8 (+3.3) | 109.2 (-138.8) | 176.8 (+9.9)                | -139.9 (+0.1) | -112.0 (-0.2)   | -179.7 (-0.7)  | 149.2 (+0.0) | -178.5 (+0.5)  | 147.8 (-1.4)  | 0.065              | 0.157                | 0.147                  |
| 3                           | 4.4  | 10.5       | 3.4 (+1.6)      | 177.9 (+0.0)  | 109.3 (-138.7) | 175.0 (+8.2)                | -140.3 (-0.2) | 106.1 (-142.0)  | -178.5 (+0.5)  | 147.8 (-1.4) | -12.1 (+166.9) | 149.0 (-0.2)  | 0.065              | 0.157                | 0.150                  |
| 4                           | 4.6  | 9.7        | 4.4 (+2.6)      | -179.4 (+2.7) | -112.7 (-0.7)  | 167.8 (+1.0)                | -140.2 (-0.1) | -112.2 (-0.3)   | -12.1 (+166.9) | 149.0 (-0.2) | -178.7 (+0.3)  | 148.0 (-1.2)  | 0.064              | 0.157                | 0.147                  |
| 5                           | 6.2  | 5.0        | 1.1 (-0.7)      | 176.2 (-1.7)  | -112.0 (+0.0)  | 167.6 (+0.7)                | -140.3 (-0.2) | 108.6 (-139.5)  |                |              |                |               |                    |                      |                        |

Table S11: Thermochemical and geometrical features of the different conformers of the first open form of compound **3b**, as evaluated at the  $\omega$ B97X-D/6-311G(d)/IEF-PCM(acetonitrile) level of theory: relative Gibbs free energy ( $\Delta G^0$ , kJ mol<sup>-1</sup>), corresponding MB population ( $P$ , %) at 298.15 K, torsional angles ( $\theta$ , °, with the relative difference with respect to the most stable conformer in parentheses) and bond length alternation (BLA, Å).

| $\Delta G^0$                | $P$ | $\theta_A$ | $\theta_B$     | $\theta_{A'}$  | $\theta_{B'}$  | $\theta_{Bp}$  | $\theta_{A''}$ | $\theta_{B''}$ | $\theta_{Pt}$ | BLA <sub>2,5</sub> | BLA <sub>2',5'</sub> | BLA <sub>2'',5''</sub> |
|-----------------------------|-----|------------|----------------|----------------|----------------|----------------|----------------|----------------|---------------|--------------------|----------------------|------------------------|
| COO [Ph(C)-BiPh(O)-PhTh(O)] |     |            |                |                |                |                |                |                |               |                    |                      |                        |
| 1                           | 0.0 | 49.2       | -111.5         | 169            | 3.2            | -179.5         | -140.6         | 1.9            | 179.8         | 150.8              | 0.157                | 0.057                  |
| 2                           | 1.4 | 27.8       | -112.8 (-1.3)  | 164.8 (-4.2)   | 2.9 (-0.3)     | -179.3 (+0.3)  | -140.9 (-0.4)  | 2.9 (+1.0)     | 0.8 (-179.0)  | 151.6 (+0.7)       | 0.157                | 0.060                  |
| 3                           | 1.9 | 23.0       | 109.5 (-138.9) | -179.6 (+11.4) | 3.5 (+0.3)     | -177.8 (+1.7)  | -141.1 (-0.5)  | 2.5 (+0.6)     | -179.9 (+0.3) | 151.3 (+0.4)       | 0.157                | 0.057                  |
| OCO [Ph(O)-BiPh(C)-PhTh(O)] |     |            |                |                |                |                |                |                |               |                    |                      |                        |
| 1                           | 0.0 | 90.5       | 2.9            | 178.3          | -112           | 167.8          | -140.2         | 2.4            | -179.5        | 148.9              | 0.069                | 0.061                  |
| 2                           | 6.7 | 6.0        | 3.8 (+0.9)     | 179.3 (+1.0)   | 109.4 (-138.7) | -175.9 (+16.3) | -140.1 (+0.0)  | 2.3 (-0.1)     | -178.9 (+0.6) | 149.8 (+0.8)       | 0.069                | 0.061                  |
| 3                           | 8.1 | 3.5        | 3.9 (+1.0)     | -179.7 (+2.1)  | -112.4 (-0.4)  | 167.3 (-0.5)   | -140.0 (+0.2)  | 2.6 (+0.2)     | -0.1 (+179.4) | 148.6 (-0.4)       | 0.069                | 0.064                  |
| OOC [Ph(O)-BiPh(O)-PhTh(C)] |     |            |                |                |                |                |                |                |               |                    |                      |                        |
| 1                           | 0.0 | 81.9       | 3.4            | 179.3          | 2.2            | 178.8          | -140.5         | -112.9         | 179.4         | 148.5              | 0.067                | 0.147                  |
| 2                           | 5.4 | 9.3        | 3.4 (+0.1)     | 179.2 (-0.1)   | 2.3 (+0.1)     | 178.7 (-0.1)   | -140.7 (-0.1)  | -111.5 (+1.4)  | -3.2 (+177.4) | 149.7 (+1.2)       | 0.066                | 0.149                  |
| 3                           | 5.5 | 8.7        | 3.2 (-0.1)     | 179.5 (+0.2)   | 2.4 (+0.1)     | 177.3 (-1.5)   | -141.3 (-0.8)  | 108.3 (-138.8) | -179.4 (+1.2) | 147.8 (-0.7)       | 0.067                | 0.147                  |
| OOO [Ph(O)-BiPh(O)-PhTh(O)] |     |            |                |                |                |                |                |                |               |                    |                      |                        |
| 1                           | 0.0 | 93.8       | 2.9            | 178.3          | 2.1            | 178            | -140.9         | 2.1            | 166.7         | 150.5              | 0.070                | 0.062                  |
| 2                           | 6.7 | 6.2        | 2.8 (-0.1)     | 178.3 (+0.0)   | 2.8 (+0.7)     | -178.5 (+3.6)  | -140.5 (+0.4)  | 3.3 (+1.2)     | -6.6 (-173.3) | 149.0 (-1.5)       | 0.070                | 0.064                  |

Table S12: Thermochemical and geometrical features of the different conformers of the two and three times open form of compound **3b**, as evaluated at the  $\omega$ B97X-D/6-311G(d)/IEF-PCM(acetonitrile) level of theory: relative Gibbs free energy ( $\Delta G^0$ , kJ mol<sup>-1</sup>), corresponding MB population ( $P$ , %) at 298.15 K, torsional angles ( $\theta$ , °, with the relative difference with respect to the most stable conformer in parentheses) and bond length alternation (BLA, Å).

## S2 NLO properties

|      | <b>C</b>   |            |            |            | <b>O</b>    |             |             |              |
|------|------------|------------|------------|------------|-------------|-------------|-------------|--------------|
|      | Static     | 1907 nm    | 1300 nm    | 1064 nm    | Static      | 1907 nm     | 1300 nm     | 1064 nm      |
| 1    | 0.4 (4.11) | 0.3 (3.86) | 0.3 (3.67) | 0.3 (3.46) | 17.1 (4.80) | 14.2 (4.88) | 24.0 (4.93) | 50.0 (4.97)  |
| 2    | 0.1 (1.70) | 0.1 (2.00) | 0.1 (2.61) | 0.2 (3.13) | 16.0 (4.83) | 13.1 (4.90) | 21.9 (4.95) | 45.3 (4.97)  |
| 3    | 0.6 (4.97) | 0.4 (4.59) | 0.5 (4.56) | 0.5 (4.49) | 34.7 (4.88) | 29.8 (4.94) | 60.1 (4.97) | 211.4 (4.97) |
| 4    | 0.4 (3.52) | 0.3 (3.49) | 0.3 (3.54) | 0.4 (3.57) | 18.1 (4.82) | 15.1 (4.89) | 26.0 (4.95) | 55.7 (5.00)  |
| 5    | 2.6 (5.21) | 2.1 (5.24) | 2.7 (5.22) | 3.6 (5.20) | 16.7 (4.88) | 13.9 (4.93) | 23.2 (4.97) | 47.2 (5.00)  |
| 6    | 2.2 (5.82) | 1.8 (5.74) | 2.3 (5.65) | 3.0 (5.55) | 17.7 (4.84) | 14.6 (4.90) | 25.1 (4.96) | 53.7 (5.00)  |
| 7    | 1.9 (5.27) | 1.6 (5.23) | 2.1 (5.23) | 2.7 (5.22) | 36.3 (4.88) | 31.6 (4.94) | 65.1 (4.98) | 238.6 (5.02) |
| 8    | 2.3 (4.91) | 1.9 (4.97) | 2.5 (5.00) | 3.2 (5.03) | 15.3 (4.94) | 12.6 (4.97) | 21.0 (4.99) | 42.1 (5.01)  |
| 9    |            |            |            |            | 33.5 (4.92) | 28.8 (4.96) | 57.2 (4.99) | 189.2 (5.00) |
| Avg. | 0.5 (3.78) | 0.4 (3.67) | 0.5 (3.71) | 0.6 (3.71) | 20.0 (4.82) | 16.7 (4.89) | 29.9 (4.94) | 77.3 (4.97)  |

Table S13: Computed static and dynamic first hyperpolarizabilities ( $\beta_{HRS}$  in  $10^3$  a.u., DR in parentheses) for the different conformers of compound **1**, as evaluated at the TDDFT/M06-2X/6-311+G(d)/IEF-PCM (acetonitrile) level of approximation. The last line contains averaged values using the MB population at 298.15 K as calculated at the  $\omega$ B97X-D/6-311G(d)/IEF-PCM (acetonitrile) level of theory.

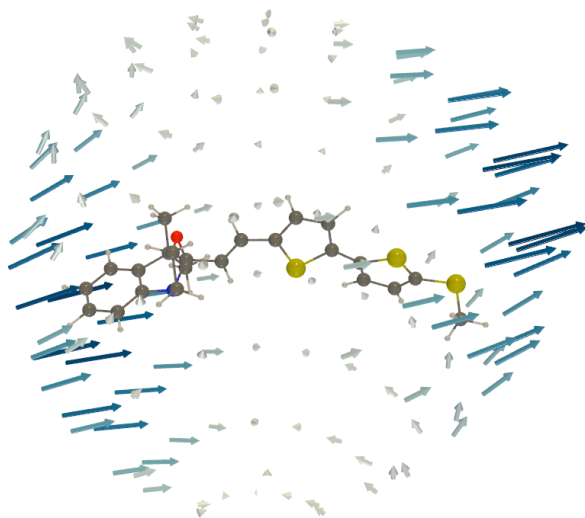

(a) **C**:  $\beta_{HRS} = 0.3$  (3.86),  $sc=5 \times 10^{-3}$

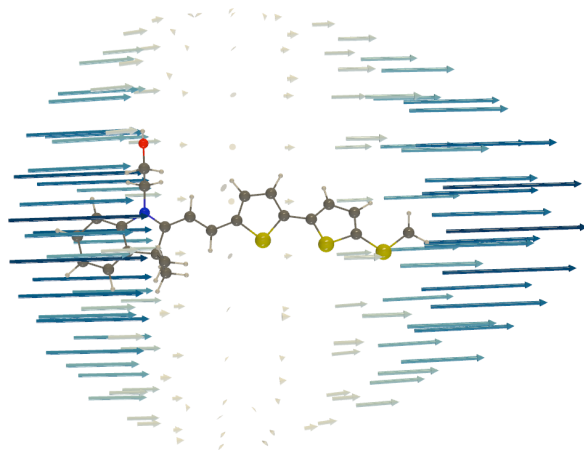

(b) **O**:  $\beta_{HRS} = 14.2$  (4.88),  $sc=10^{-4}$

Figure S1: USR (together with  $\beta_{HRS}$  [ $10^3$  a.u., DR in parentheses] and scaling factor [ $sc$ ,  $\text{\AA a.u.}^{-1}$ ]) of the dynamic ( $\lambda = 1907$  nm)  $\beta$  tensor of the most stable conformers of each form of **1**, as evaluated at the TDDFT/M06-2X/6-311+G(d)/IEF-PCM (acetonitrile) level of approximation.

|      | CC         |            |            |            | CO          |             |             |              | OO         |            |            |             |
|------|------------|------------|------------|------------|-------------|-------------|-------------|--------------|------------|------------|------------|-------------|
|      | Static     | 1907 nm    | 1300 nm    | 1064 nm    | Static      | 1907 nm     | 1300 nm     | 1064 nm      | Static     | 1907 nm    | 1300 nm    | 1064 nm     |
| 1    | 0.5 (4.08) | 0.4 (3.78) | 0.5 (3.83) | 0.6 (3.89) | 26.1 (4.80) | 25.3 (4.89) | 48.9 (4.94) | 140.8 (4.97) | 3.1 (2.35) | 2.6 (2.46) | 4.5 (2.59) | 13.3 (2.32) |
| 2    | 0.5 (6.02) | 0.5 (5.46) | 0.6 (5.38) | 0.7 (5.25) | 26.5 (4.80) | 25.6 (4.89) | 50.0 (4.95) | 147.3 (4.98) | 2.0 (2.54) | 1.7 (2.66) | 3.1 (2.72) | 10.8 (2.16) |
| 3    | 0.2 (3.68) | 0.2 (3.83) | 0.2 (3.93) | 0.3 (4.01) | 28.9 (4.86) | 27.9 (4.93) | 54.2 (4.96) | 161.0 (4.98) | 2.6 (1.95) | 2.2 (2.03) | 4.5 (2.29) | 24.1 (2.44) |
| 4    | 0.2 (3.45) | 0.2 (3.27) | 0.2 (3.31) | 0.2 (3.33) | 27.7 (4.80) | 26.9 (4.88) | 53.2 (4.95) | 159.5 (5.01) |            |            |            |             |
| 5    | 0.3 (3.20) | 0.2 (3.29) | 0.3 (3.34) | 0.3 (3.37) | 28.7 (4.84) | 27.5 (4.91) | 53.5 (4.95) | 159.4 (4.97) |            |            |            |             |
| 6    | 0.5 (3.64) | 0.4 (3.70) | 0.4 (3.77) | 0.5 (3.86) | 31.4 (4.86) | 30.6 (4.92) | 61.3 (4.97) | 194.5 (5.01) |            |            |            |             |
| 7    | 0.6 (6.27) | 0.6 (5.65) | 0.7 (5.51) | 1.0 (5.36) | 27.5 (4.80) | 26.7 (4.89) | 53.0 (4.96) | 159.2 (5.01) |            |            |            |             |
| 8    | 0.8 (4.92) | 0.7 (4.64) | 0.8 (4.67) | 1.0 (4.70) | 30.0 (4.84) | 29.0 (4.91) | 57.3 (4.96) | 173.5 (5.01) |            |            |            |             |
| 9    |            |            |            |            | 24.8 (4.86) | 24.2 (4.92) | 45.6 (4.97) | 118.7 (5.00) |            |            |            |             |
| 10   |            |            |            |            | 25.5 (4.87) | 24.9 (4.93) | 47.4 (4.97) | 128.3 (5.00) |            |            |            |             |
| 11   |            |            |            |            | 27.7 (4.93) | 27.0 (4.97) | 51.2 (4.99) | 138.9 (5.00) |            |            |            |             |
| Avg. | 0.4 (4.01) | 0.3 (3.86) | 0.4 (3.91) | 0.5 (3.96) | 27.0 (4.81) | 26.1 (4.90) | 50.8 (4.95) | 148.5 (4.98) | 2.8 (2.33) | 2.3 (2.43) | 4.2 (2.57) | 14.4 (2.31) |

Table S14: Computed static and dynamic first hyperpolarizabilities ( $\beta_{HRS}$  in  $10^3$  a.u., DR in parentheses) for the different conformers of compound **2a**, as evaluated at the TDDFT/M06-2X/6-311+G(d)/IEF-PCM (acetonitrile) level of approximation. The last line contains averaged values using the MB population at 298.15 K as calculated at the  $\omega$ B97X-D/6-311G(d)/IEF-PCM (acetonitrile) level of theory.

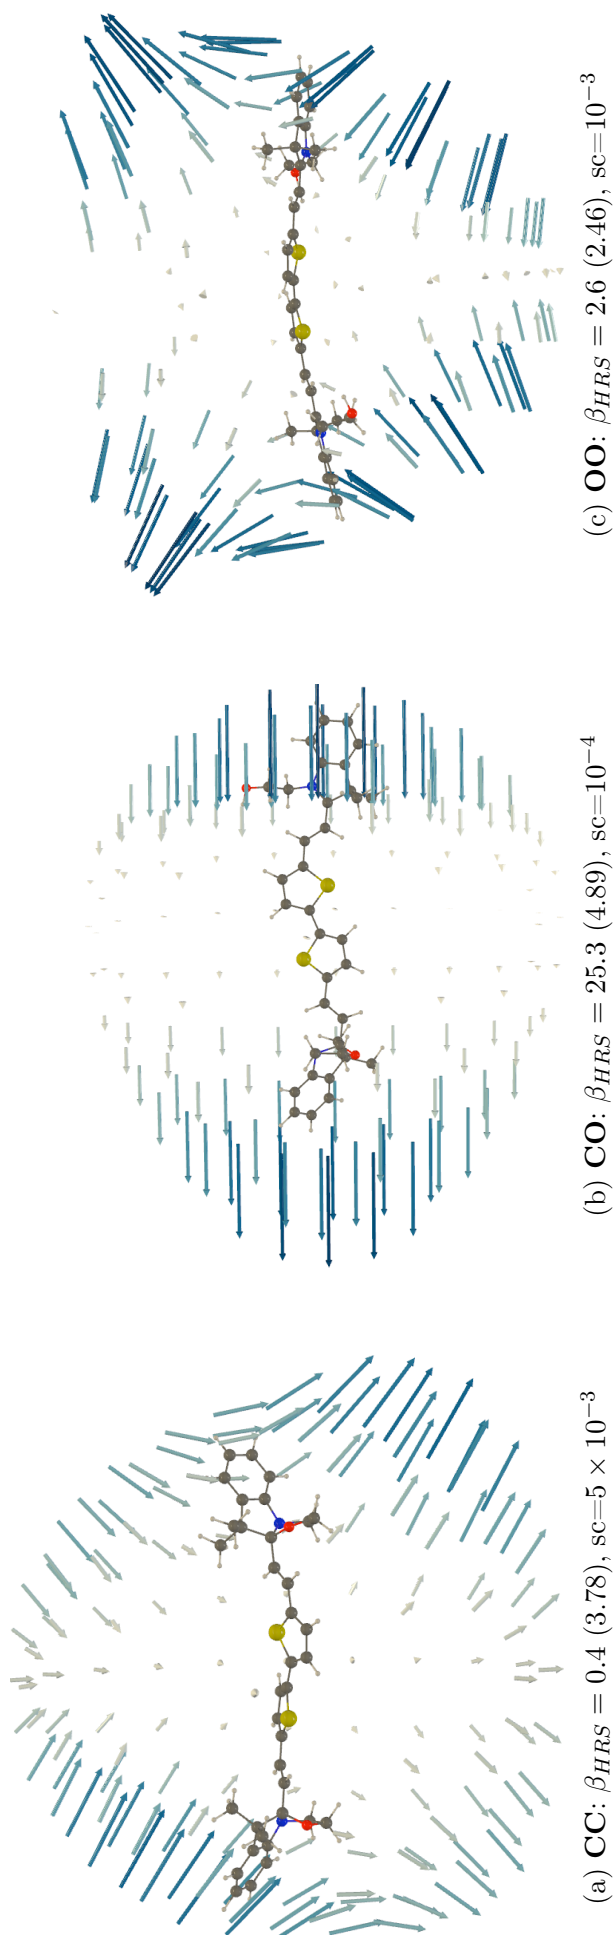

Figure S2: USR (together with  $\beta_{HRS}$  [ $10^3$  a.u., DR in parentheses] and scaling factor [ $sc$ ,  $\text{\AA a.u.}^{-1}$ ]) of the dynamic ( $\lambda = 1907$  nm)  $\beta$  tensor of the most stable conformers of each form of **2a**, as evaluated at the TDDFT/M06-2X/6-311+G(d)/IEF-PCM (acetonitrile) level of approximation.



|      | CC         |            |            |            | CO         |            |            |             | OO         |            |            |            |
|------|------------|------------|------------|------------|------------|------------|------------|-------------|------------|------------|------------|------------|
|      | Static     | 1907 nm    | 1300 nm    | 1064 nm    | Static     | 1907 nm    | 1300 nm    | 1064 nm     | Static     | 1907 nm    | 1300 nm    | 1064 nm    |
| 1    | 0.5 (5.13) | 0.3 (3.95) | 0.4 (4.00) | 0.4 (4.03) | 6.9 (4.49) | 6.1 (4.62) | 8.9 (4.75) | 14.4 (4.87) | 4.9 (2.38) | 4.3 (2.43) | 6.2 (2.50) | 9.7 (2.59) |
| 2    | 0.8 (5.59) | 0.6 (4.48) | 0.7 (4.55) | 0.7 (4.61) | 6.8 (4.41) | 6.0 (4.55) | 8.8 (4.69) | 14.1 (4.83) | 4.7 (2.53) | 4.1 (2.55) | 5.8 (2.60) | 9.1 (2.66) |
| 3    | 0.8 (5.27) | 0.6 (4.28) | 0.7 (4.32) | 0.8 (4.36) | 6.8 (4.42) | 6.0 (4.60) | 8.7 (4.72) | 13.7 (4.85) | 4.2 (2.71) | 3.7 (2.70) | 5.1 (2.76) | 8.0 (2.77) |
| 4    | 0.6 (4.37) | 0.4 (3.60) | 0.5 (3.67) | 0.5 (3.72) | 7.2 (4.49) | 6.4 (4.60) | 9.3 (4.73) | 14.9 (4.85) | 4.8 (2.45) | 4.3 (2.52) | 6.2 (2.58) | 9.7 (2.66) |
| 5    | 0.5 (3.61) | 0.4 (3.29) | 0.4 (3.34) | 0.5 (3.37) | 6.7 (4.52) | 6.0 (4.65) | 8.8 (4.76) | 14.1 (4.88) |            |            |            |            |
| 6    | 0.3 (4.96) | 0.3 (3.85) | 0.3 (3.84) | 0.3 (3.80) |            |            |            |             |            |            |            |            |
| 7    | 0.4 (5.80) | 0.3 (4.09) | 0.3 (4.09) | 0.4 (4.06) |            |            |            |             |            |            |            |            |
| Avg. | 0.5 (5.11) | 0.4 (3.99) | 0.4 (4.04) | 0.5 (4.07) | 6.9 (4.48) | 6.1 (4.61) | 8.9 (4.74) | 14.4 (4.87) | 4.9 (2.43) | 4.2 (2.47) | 6.1 (2.54) | 9.5 (2.62) |

Table S15: Computed static and dynamic first hyperpolarizabilities ( $\beta_{HRS}$  in  $10^3$  a.u., DR in parentheses) for the different conformers of compound **2b**, as evaluated at the TDDFT/M06-2X/6-311+G(d)/IEF-PCM (acetonitrile) level of approximation. The last line contains averaged values using the MB population at 298.15 K as calculated at the  $\omega$ B97X-D/6-311G(d)/IEF-PCM (acetonitrile) level of theory.

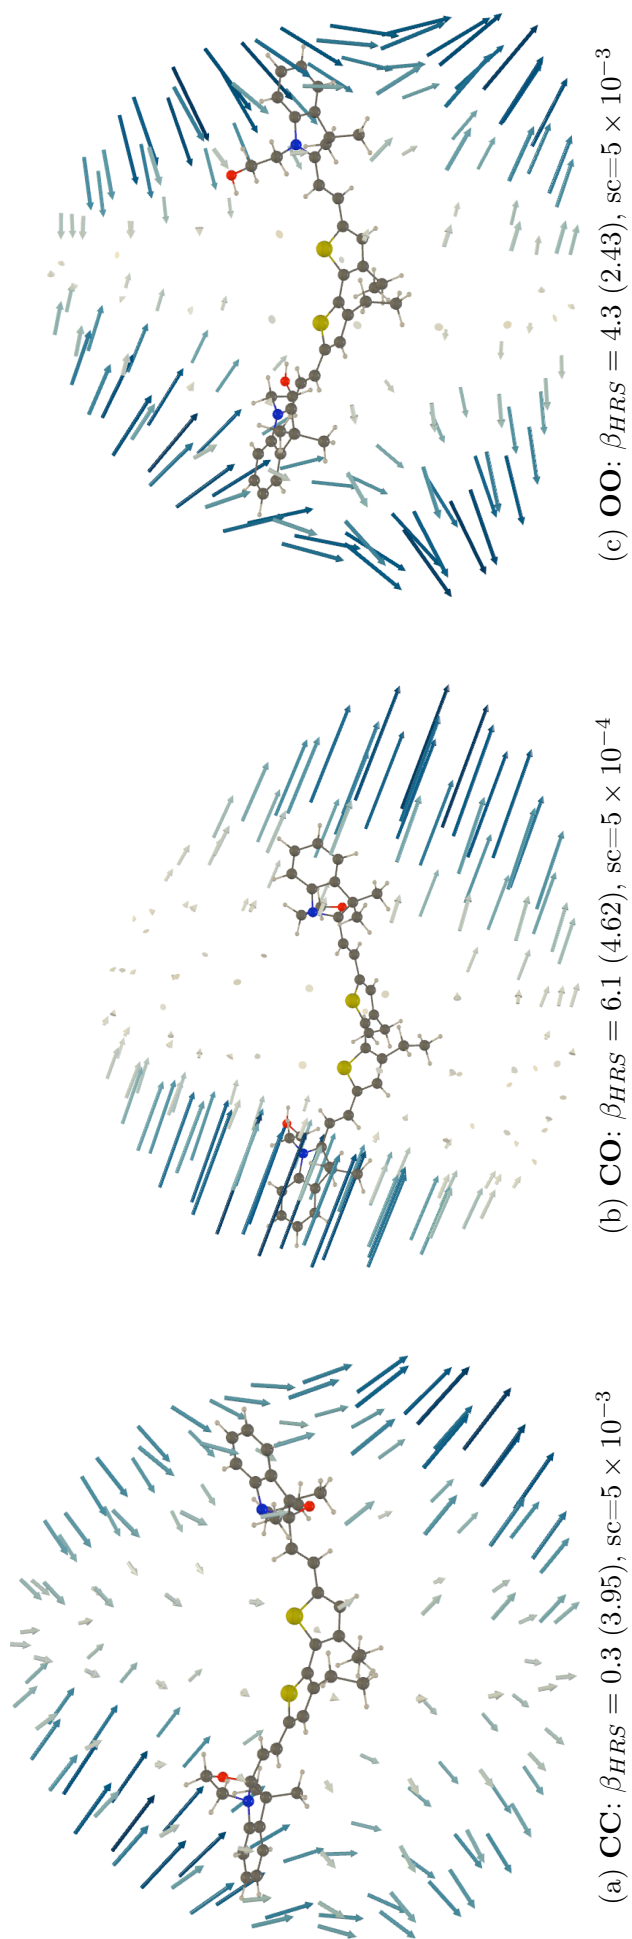

Figure S3: USR (together with  $\beta_{HRS}$  [ $10^3$  a.u., DR in parentheses] and scaling factor [ $sc$ ,  $\text{\AA a.u.}^{-1}$ ]) of the dynamic ( $\lambda = 1907$  nm)  $\beta$  tensor of the most stable conformers of each form of **2b**, as evaluated at the TDDFT/M06-2X/6-311+G(d)/IEF-PCM (acetonitrile) level of approximation.

|      | CC         |            |            |            | CO          |             |             |               | OO          |             |             |              |
|------|------------|------------|------------|------------|-------------|-------------|-------------|---------------|-------------|-------------|-------------|--------------|
|      | Static     | 1907 nm    | 1300 nm    | 1064 nm    | Static      | 1907 nm     | 1300 nm     | 1064 nm       | Static      | 1907 nm     | 1300 nm     | 1064 nm      |
| 1    | 1.5 (3.32) | 1.2 (3.06) | 1.5 (3.09) | 2.0 (3.11) | 37.0 (4.78) | 32.1 (4.88) | 72.8 (4.96) | 623.9 (5.02)  | 12.2 (2.35) | 10.7 (2.49) | 24.8 (2.54) | 105.0 (1.07) |
| 2    | 1.5 (3.31) | 1.2 (3.06) | 1.5 (3.10) | 2.0 (3.11) | 37.4 (4.79) | 32.4 (4.88) | 73.4 (4.96) | 646.2 (5.02)  | 7.6 (2.69)  | 7.1 (2.81)  | 16.5 (2.51) | 60.0 (1.16)  |
| 3    | 1.4 (3.05) | 1.1 (2.90) | 1.4 (2.94) | 1.9 (2.95) | 41.0 (4.81) | 35.8 (4.89) | 81.6 (4.97) | 771.7 (5.02)  | 10.3 (2.50) | 9.2 (2.64)  | 21.5 (2.55) | 82.0 (1.07)  |
| 4    | 1.3 (3.52) | 1.0 (3.47) | 1.3 (3.54) | 1.8 (3.57) | 39.5 (4.81) | 34.5 (4.90) | 80.4 (4.97) | 873.7 (5.01)  |             |             |             |              |
| 5    | 1.4 (3.50) | 1.1 (3.28) | 1.4 (3.32) | 1.9 (3.34) | 39.3 (4.80) | 33.9 (4.88) | 76.0 (4.96) | 604.7 (5.02)  |             |             |             |              |
| 6    | 1.3 (3.55) | 1.1 (3.31) | 1.4 (3.35) | 1.8 (3.37) | 42.7 (4.82) | 37.3 (4.90) | 87.2 (4.97) | 1073.8 (5.01) |             |             |             |              |
| 7    | 0.9 (3.63) | 0.7 (3.36) | 0.9 (3.38) | 1.2 (3.34) | 40.8 (4.81) | 35.3 (4.89) | 81.3 (4.96) | 811.0 (5.01)  |             |             |             |              |
| 8    | 1.2 (3.79) | 1.0 (3.37) | 1.2 (3.37) | 1.5 (3.34) | 39.2 (4.81) | 34.2 (4.89) | 79.8 (4.96) | 874.5 (5.01)  |             |             |             |              |
| 9    |            |            |            |            | 37.2 (4.87) | 32.5 (4.93) | 73.3 (4.99) | 608.7 (5.03)  |             |             |             |              |
| 10   |            |            |            |            | 40.3 (4.86) | 35.3 (4.93) | 79.4 (4.99) | 621.1 (5.03)  |             |             |             |              |
| Avg. | 1.4 (3.30) | 1.2 (3.08) | 1.5 (3.12) | 1.9 (3.13) | 37.8 (4.79) | 32.9 (4.88) | 74.6 (4.96) | 666.6 (5.02)  | 11.0 (2.44) | 9.7 (2.58)  | 22.6 (2.54) | 92.5 (1.09)  |

Table S16: Computed static and dynamic first hyperpolarizabilities ( $\beta_{HRS}$  in  $10^3$  a.u., DR in parentheses) for the different conformers of compound **2c**, as evaluated at the TDDFT/M06-2X/6-311+G(d)/IEF-PCM (acetonitrile) level of approximation. The last line contains averaged values using the MB population at 298.15 K as calculated at the  $\omega$ B97X-D/6-311G(d)/IEF-PCM (acetonitrile) level of theory.

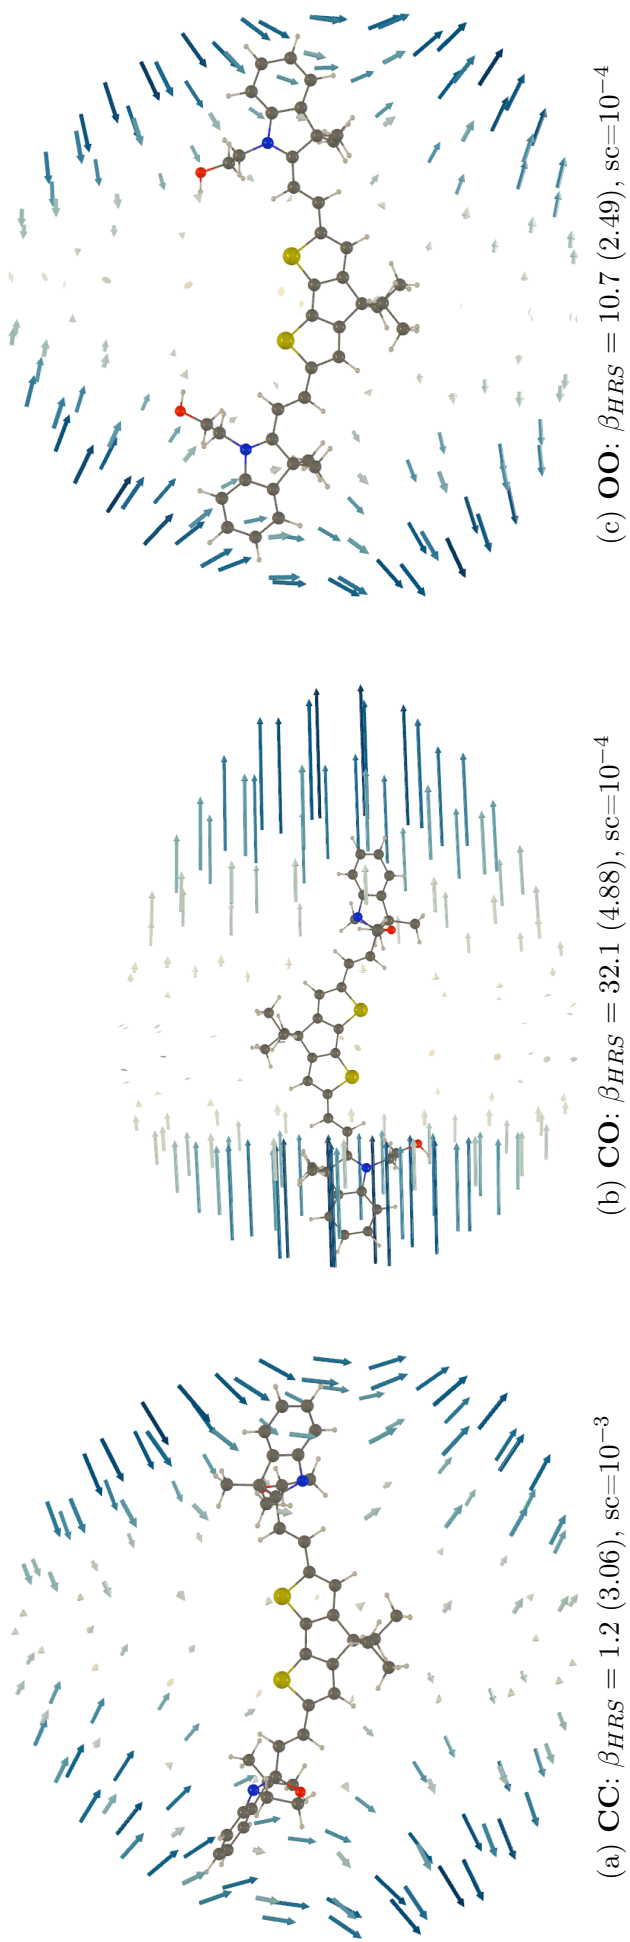

Figure S4: USR (together with  $\beta_{HRS}$  [ $10^3$  a.u., DR in parentheses] and scaling factor [ $sc$ ,  $\text{\AA a.u.}^{-1}$ ]) of the dynamic ( $\lambda = 1907$  nm)  $\beta$  tensor of the most stable conformers of each form of **2c**, as evaluated at the TDDFT/M06-2X/6-311+G(d)/IEF-PCM (acetonitrile) level of approximation.

|      | CC         |            |            |            | CO          |             |             |               | OO         |            |            |             |
|------|------------|------------|------------|------------|-------------|-------------|-------------|---------------|------------|------------|------------|-------------|
|      | Static     | 1907 nm    | 1300 nm    | 1064 nm    | Static      | 1907 nm     | 1300 nm     | 1064 nm       | Static     | 1907 nm    | 1300 nm    | 1064 nm     |
| 1    | 0.4 (4.43) | 0.4 (4.05) | 0.4 (4.19) | 0.5 (4.37) | 34.2 (4.81) | 31.6 (4.90) | 75.1 (4.95) | 1129.6 (4.93) | 0.1 (3.99) | 0.1 (3.35) | 0.1 (2.83) | 0.6 (3.09)  |
| 2    | 0.1 (2.16) | 0.1 (2.62) | 0.1 (2.85) | 0.1 (3.00) | 36.4 (4.81) | 33.7 (4.90) | 78.5 (4.95) | 924.4 (4.93)  | 0.3 (2.36) | 0.3 (2.60) | 0.8 (2.73) | 6.6 (2.04)  |
| 3    |            |            |            |            | 36.3 (4.93) | 33.3 (4.97) | 76.2 (5.00) | 540.5 (5.01)  | 2.1 (2.87) | 1.8 (2.73) | 4.6 (2.92) | 20.8 (1.14) |
| 4    |            |            |            |            | 33.8 (4.81) | 31.2 (4.90) | 74.0 (4.95) | 1075.6 (4.94) | 1.8 (2.75) | 1.3 (2.52) | 3.0 (2.48) | 15.3 (2.10) |
| 5    |            |            |            |            | 35.6 (4.81) | 32.6 (4.89) | 75.9 (4.95) | 885.1 (4.93)  |            |            |            |             |
| Avg. | 0.4 (4.02) | 0.3 (3.79) | 0.4 (3.95) | 0.5 (4.12) | 34.9 (4.83) | 32.1 (4.91) | 75.7 (4.96) | 1009.0 (4.94) | 0.3 (3.75) | 0.2 (3.23) | 0.5 (2.82) | 2.7 (2.85)  |

Table S17: Computed static and dynamic first hyperpolarizabilities ( $\beta_{HRS}$  in  $10^3$  a.u., DR in parentheses) for the different conformers of compound **2d**, as evaluated at the TDDFT/M06-2X/6-311+G(d)/IEF-PCM (acetonitrile) level of approximation. The last line contains averaged values using the MB population at 298.15 K as calculated at the  $\omega$ B97X-D/6-311G(d)/IEF-PCM (acetonitrile) level of theory.

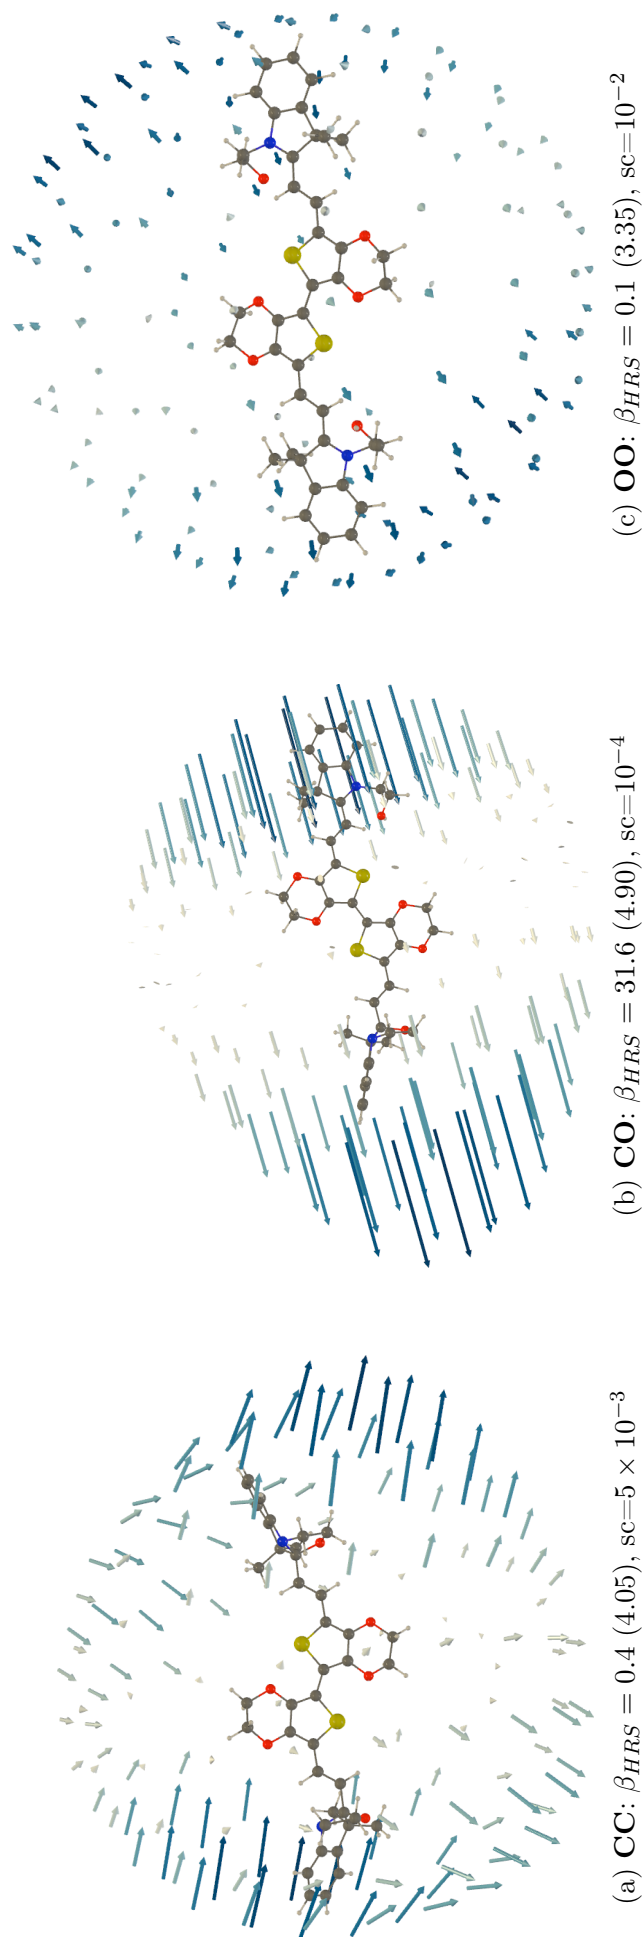

Figure S5: USR (together with  $\beta_{HRS}$  [ $10^3$  a.u., DR in parentheses] and scaling factor [ $sc$ ,  $\text{\AA a.u.}^{-1}$ ]) of the dynamic ( $\lambda = 1907$  nm)  $\beta$  tensor of the most stable conformers of each form of **2d**, as evaluated at the TDDFT/M06-2X/6-311+G(d)/IEF-PCM (acetonitrile) level of approximation.

| CC   |            |            |            |            | CO          |             |              |               |             | OO          |             |              |             |             |
|------|------------|------------|------------|------------|-------------|-------------|--------------|---------------|-------------|-------------|-------------|--------------|-------------|-------------|
|      | Static     | 1907 nm    | 1300 nm    | 1064 nm    | Static      | 1907 nm     | 1300 nm      | 1064 nm       | Static      | 1907 nm     | 1300 nm     | 1064 nm      | Static      | 1907 nm     |
| 1    | 1.5 (6.47) | 1.3 (6.06) | 2.0 (5.79) | 3.4 (5.40) | 57.3 (4.90) | 62.0 (4.96) | 178.2 (4.98) | 1439.2 (4.95) | 10.8 (2.70) | 10.8 (2.64) | 31.7 (2.74) | 51.5 (0.13)  | 10.8 (2.70) | 10.8 (2.64) |
| 2    | 1.1 (3.16) | 0.8 (3.46) | 1.1 (3.45) | 1.7 (3.41) | 61.1 (4.90) | 67.2 (4.96) | 192.5 (4.98) | 1567.8 (4.95) | 16.2 (2.48) | 14.6 (2.64) | 41.0 (2.58) | 66.6 (0.41)  | 16.2 (2.48) | 14.6 (2.64) |
| 3    | 1.4 (7.59) | 1.0 (6.41) | 1.2 (6.62) | 1.7 (5.93) | 53.9 (4.91) | 58.2 (4.96) | 163.7 (4.97) | 1819.0 (4.92) | 17.9 (2.67) | 16.7 (2.85) | 47.4 (2.89) | 106.6 (1.14) | 17.9 (2.67) | 16.7 (2.85) |
| 4    | 0.7 (5.02) | 0.4 (6.15) | 0.5 (6.07) | 0.6 (3.63) | 56.8 (4.90) | 61.7 (4.96) | 176.4 (4.98) | 1552.4 (4.96) |             |             |             |              |             |             |
| 5    | 1.5 (7.00) | 1.3 (6.02) | 1.9 (5.83) | 3.0 (5.42) | 49.7 (4.96) | 53.0 (5.00) | 148.4 (4.97) | 1471.2 (4.84) |             |             |             |              |             |             |
| 6    | 2.8 (5.37) | 2.1 (5.20) | 2.6 (5.20) | 3.6 (4.92) | 60.5 (4.90) | 65.8 (4.95) | 188.0 (4.98) | 1543.5 (4.95) |             |             |             |              |             |             |
| 7    | 1.2 (3.38) | 1.1 (4.23) | 1.8 (4.48) | 3.2 (4.68) | 52.9 (5.02) | 56.5 (5.03) | 160.0 (4.98) | 1191.2 (4.80) |             |             |             |              |             |             |
| 8    | 1.1 (2.39) | 0.8 (2.66) | 1.1 (2.74) | 1.7 (2.79) | 45.8 (5.10) | 46.4 (5.10) | 127.6 (5.03) | 1201.5 (4.82) |             |             |             |              |             |             |
| 9    | 1.6 (3.82) | 1.5 (4.16) | 2.1 (4.21) | 3.3 (4.25) | 58.0 (4.91) | 63.7 (4.96) | 178.7 (4.98) | 2015.2 (4.94) |             |             |             |              |             |             |
| 10   | 2.8 (4.72) | 2.1 (4.30) | 2.7 (4.32) | 3.7 (4.15) | 54.7 (4.90) | 59.4 (4.95) | 169.8 (4.97) | 1554.9 (4.92) |             |             |             |              |             |             |
| 11   | 1.3 (3.62) | 1.1 (4.09) | 1.6 (4.09) | 2.5 (4.08) | 57.5 (4.90) | 62.4 (4.95) | 174.5 (4.97) | 2014.6 (4.94) |             |             |             |              |             |             |
| Avg. | 1.4 (5.15) | 1.1 (5.09) | 1.6 (5.07) | 2.5 (4.62) | 56.4 (4.92) | 61.1 (4.97) | 174.2 (4.98) | 1523.2 (4.93) | 11.9 (2.66) | 11.6 (2.65) | 33.7 (2.72) | 55.5 (0.20)  | 11.9 (2.66) | 11.6 (2.65) |

Table S18: Computed static and dynamic first hyperpolarizabilities ( $\beta_{HRS}$  in  $10^3$  a.u., DR in parentheses) for the different conformers of compound **2e**, as evaluated at the TDDFT/M06-2X/6-311+G(d)/IEF-PCM (acetonitrile) level of approximation. The last line contains averaged values using the MB population at 298.15 K as calculated at the  $\omega$ B97X-D/6-311G(d)/IEF-PCM (acetonitrile) level of theory.

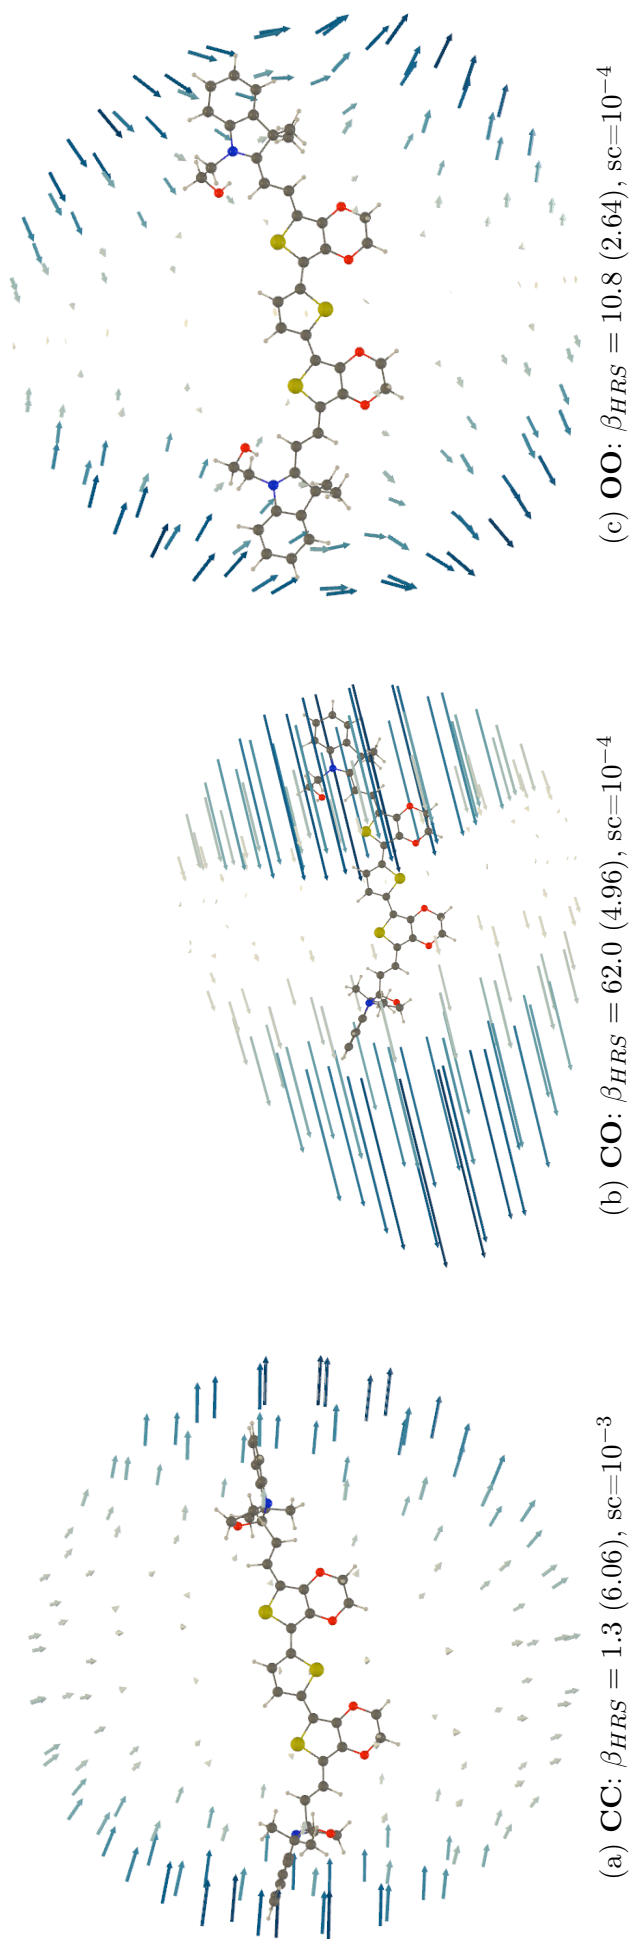

Figure S6: USR (together with  $\beta_{HRS}$  [ $10^3$  a.u., DR in parentheses] and scaling factor [ $sc$ ,  $\text{\AA a.u.}^{-1}$ ]) of the dynamic ( $\lambda = 1907$  nm)  $\beta$  tensor of the most stable conformers of each form of **2e**, as evaluated at the TDDFT/M06-2X/6-311+G(d)/IEF-PCM (acetonitrile) level of approximation.



| CCC  |            |            |            |            | CCO         |             |              |              |  |
|------|------------|------------|------------|------------|-------------|-------------|--------------|--------------|--|
|      | Static     | 1907 nm    | 1300 nm    | 1064 nm    | Static      | 1907 nm     | 1300 nm      | 1064 nm      |  |
| 1    | 4.1 (1.64) | 4.4 (1.58) | 5.9 (1.56) | 8.5 (1.55) | 44.2 (4.50) | 53.8 (4.56) | 118.3 (4.75) | 554.9 (4.97) |  |
| 2    | 4.3 (1.87) | 4.5 (1.74) | 6.0 (1.69) | 8.6 (1.65) | 43.7 (4.46) | 53.4 (4.53) | 117.5 (4.74) | 548.0 (4.97) |  |
| 3    | 4.2 (1.74) | 4.5 (1.65) | 6.1 (1.63) | 8.7 (1.61) | 42.4 (4.48) | 51.4 (4.53) | 112.8 (4.74) | 522.8 (4.97) |  |
| 4    | 4.2 (1.80) | 4.5 (1.69) | 6.1 (1.66) | 8.6 (1.63) | 41.0 (4.43) | 50.0 (4.50) | 109.2 (4.72) | 486.9 (4.96) |  |
| 5    | 4.2 (1.81) | 4.5 (1.69) | 6.1 (1.66) | 8.7 (1.63) | 42.7 (4.51) | 51.2 (4.55) | 110.7 (4.75) | 487.3 (4.96) |  |
| 6    | 4.1 (1.55) | 4.5 (1.53) | 6.2 (1.53) | 8.9 (1.52) | 42.8 (4.52) | 51.1 (4.55) | 111.7 (4.75) | 521.7 (4.97) |  |
| 7    | 4.1 (1.70) | 4.5 (1.62) | 6.1 (1.61) | 8.7 (1.59) | 38.2 (4.41) | 46.0 (4.47) | 97.1 (4.69)  | 383.5 (4.93) |  |
| 8    | 4.1 (1.61) | 4.4 (1.57) | 6.0 (1.55) | 8.6 (1.54) | 39.7 (4.39) | 48.8 (4.48) | 103.0 (4.70) | 400.3 (4.93) |  |
| 9    | 4.1 (1.68) | 4.5 (1.62) | 6.2 (1.61) | 8.8 (1.60) | 39.7 (4.39) | 48.8 (4.48) | 103.0 (4.70) | 400.4 (4.93) |  |
| 10   | 4.1 (1.64) | 4.3 (1.59) | 5.9 (1.58) | 8.4 (1.56) | 39.7 (4.40) | 47.9 (4.48) | 102.1 (4.70) | 417.2 (4.94) |  |
| 11   | 4.1 (1.65) | 4.4 (1.60) | 6.0 (1.58) | 8.7 (1.57) | 39.3 (4.43) | 47.3 (4.49) | 98.9 (4.70)  | 375.2 (4.93) |  |
| 12   | 4.1 (1.52) | 4.5 (1.52) | 6.2 (1.52) | 8.8 (1.52) | 38.8 (4.37) | 47.5 (4.47) | 101.0 (4.69) | 403.3 (4.93) |  |
| 13   | 4.1 (1.63) | 4.3 (1.58) | 5.9 (1.56) | 8.4 (1.55) |             |             |              |              |  |
| 14   | 4.1 (1.60) | 4.5 (1.57) | 6.1 (1.56) | 8.8 (1.55) |             |             |              |              |  |
| 15   | 4.1 (1.56) | 4.5 (1.55) | 6.2 (1.54) | 8.9 (1.54) |             |             |              |              |  |
| 16   | 4.1 (1.55) | 4.4 (1.54) | 6.0 (1.53) | 8.6 (1.53) |             |             |              |              |  |
| 17   | 4.1 (1.59) | 4.5 (1.57) | 6.1 (1.56) | 8.7 (1.56) |             |             |              |              |  |
| Avg. | 4.2 (1.72) | 4.4 (1.64) | 6.0 (1.61) | 8.6 (1.59) | 43.1 (4.47) | 52.5 (4.54) | 114.9 (4.74) | 528.1 (4.96) |  |

  

| COO  |             |             |              |              | OOO         |             |              |              |  |
|------|-------------|-------------|--------------|--------------|-------------|-------------|--------------|--------------|--|
|      | Static      | 1907 nm     | 1300 nm      | 1064 nm      | Static      | 1907 nm     | 1300 nm      | 1064 nm      |  |
| 1    | 45.1 (2.88) | 55.0 (2.88) | 116.1 (3.05) | 515.6 (2.93) | 40.7 (1.56) | 51.2 (1.53) | 107.5 (1.53) | 417.5 (1.54) |  |
| 2    | 44.3 (2.96) | 53.8 (2.93) | 112.8 (3.09) | 477.0 (3.02) | 38.6 (1.65) | 49.1 (1.58) | 103.7 (1.56) | 405.3 (1.55) |  |
| 3    | 45.9 (2.86) | 55.9 (2.86) | 118.1 (3.02) | 537.5 (2.87) | 39.9 (1.61) | 50.3 (1.55) | 105.9 (1.53) | 415.0 (1.53) |  |
| 4    | 45.2 (2.90) | 55.1 (2.88) | 116.2 (3.04) | 526.1 (2.90) | 39.3 (0.00) | 49.7 (0.00) | 103.3 (0.00) | 381.0 (0.00) |  |
| 5    | 46.6 (3.07) | 56.2 (3.01) | 117.8 (3.17) | 513.3 (3.02) | 39.1 (1.54) | 49.5 (1.52) | 103.8 (1.52) | 399.1 (1.51) |  |
| 6    | 47.1 (3.03) | 57.1 (2.98) | 119.9 (3.14) | 538.6 (2.96) | 39.0 (1.54) | 49.3 (1.51) | 103.2 (1.51) | 393.5 (1.53) |  |
| 7    |             |             |              |              | 37.5 (1.63) | 47.3 (1.57) | 98.8 (1.56)  | 370.3 (1.55) |  |
| Avg. | 45.4 (2.92) | 55.2 (2.91) | 116.2 (3.07) | 514.4 (2.94) | 39.8 (1.52) | 50.3 (1.47) | 105.7 (1.46) | 410.4 (1.46) |  |

Table S19: Computed static and dynamic first hyperpolarizabilities ( $\beta_{HRS}$  in  $10^3$  a.u., DR in parentheses) for the different conformers of compound **3a**, as evaluated at the TDDFT/M06-2X/6-311+G(d)/IEF-PCM (acetonitrile) level of approximation. The last line contains averaged values using the MB population at 298.15 K as calculated at the  $\omega$ B97X-D/6-311G(d)/IEF-PCM (acetonitrile) level of theory.

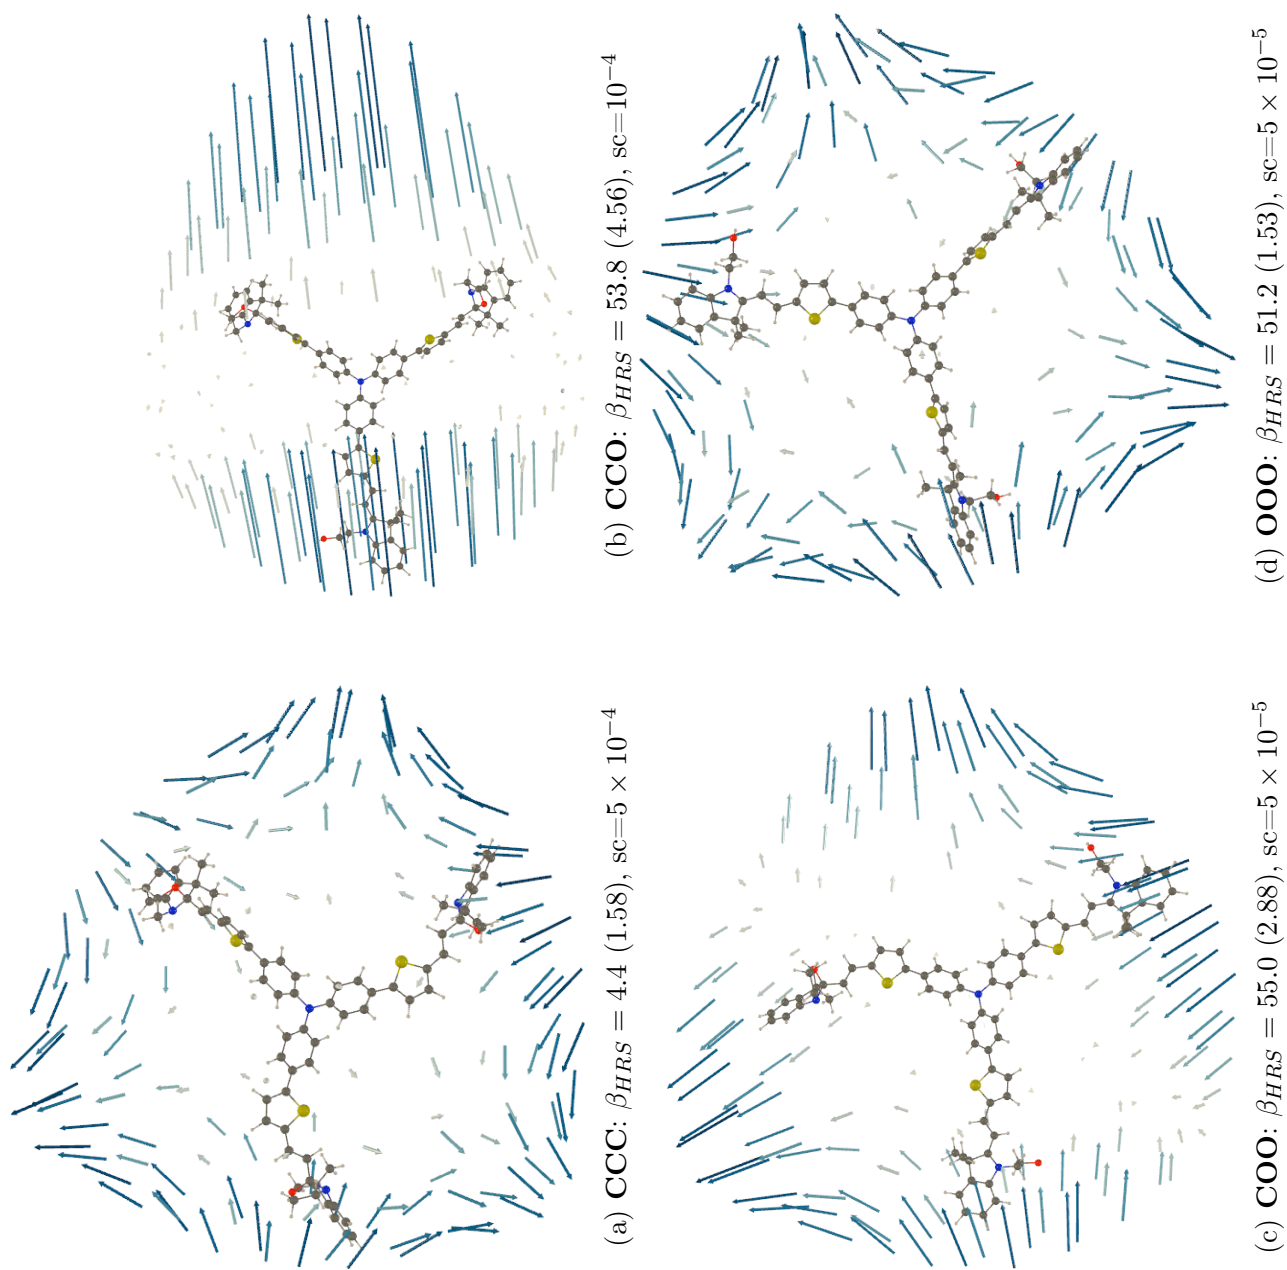

Figure S7: USR (together with  $\beta_{HRS}$  [ $10^3$  a.u., DR in parentheses] and scaling factor [ $sc$ ,  $\text{\AA a.u.}^{-1}$ ]) of the dynamic ( $\lambda = 1907$  nm)  $\beta$  tensor of the most stable conformers of each form of **3a**, as evaluated at the TDDFT/M06-2X/6-311+G(d)/IEF-PCM (acetonitrile) level of approximation.

| CCC [Ph(C)-BiPh(C)-PhTh(C)] |             |             |             | CCO [Ph(C)-BiPh(C)-PhTh(O)] |             |             |              |              |
|-----------------------------|-------------|-------------|-------------|-----------------------------|-------------|-------------|--------------|--------------|
|                             | Static      | 1907 nm     | 1300 nm     | 1064 nm                     | Static      | 1907 nm     | 1300 nm      | 1064 nm      |
| 1                           | 3.6 (1.61)  | 3.7 (1.61)  | 5.0 (1.62)  | 6.9 (1.66)                  | 42.0 (4.66) | 47.8 (4.70) | 106.4 (4.83) | 491.8 (4.92) |
| 2                           | 3.6 (1.66)  | 3.7 (1.63)  | 5.0 (1.65)  | 6.9 (1.68)                  | 42.5 (4.66) | 48.6 (4.70) | 108.9 (4.83) | 520.3 (4.93) |
| 3                           | 3.7 (1.67)  | 3.8 (1.66)  | 5.1 (1.68)  | 7.1 (1.71)                  | 42.2 (4.65) | 49.6 (4.68) | 119.5 (4.85) | 512.3 (4.92) |
| 4                           | 3.7 (1.67)  | 3.9 (1.66)  | 5.2 (1.68)  | 7.2 (1.71)                  | 41.7 (4.65) | 47.7 (4.69) | 105.6 (4.83) | 477.9 (4.92) |
| 5                           | 3.6 (1.63)  | 3.8 (1.62)  | 5.0 (1.64)  | 7.0 (1.67)                  | 44.5 (4.58) | 51.3 (4.65) | 115.2 (4.82) | 536.6 (4.99) |
| 6                           | 3.7 (1.66)  | 3.9 (1.65)  | 5.2 (1.67)  | 7.2 (1.70)                  |             |             |              |              |
| 7                           | 3.5 (1.54)  | 3.7 (1.55)  | 4.9 (1.56)  | 6.8 (1.59)                  |             |             |              |              |
| Avg.                        | 3.6 (1.64)  | 3.8 (1.63)  | 5.0 (1.65)  | 7.0 (1.68)                  | 42.2 (4.66) | 48.3 (4.69) | 108.8 (4.83) | 502.4 (4.92) |
| COC [Ph(C)-BiPh(O)-PhTh(C)] |             |             |             | OCC [Ph(O)-BiPh(C)-PhTh(C)] |             |             |              |              |
| 1                           | 28.3 (4.15) | 34.4 (4.31) | 64.4 (4.53) | 154.9 (4.76)                | 31.7 (4.67) | 30.4 (4.72) | 56.9 (4.83)  | 149.8 (4.94) |
| 2                           | 27.4 (4.14) | 33.5 (4.32) | 62.5 (4.53) | 149.1 (4.76)                | 32.2 (4.65) | 31.1 (4.69) | 59.0 (4.81)  | 159.7 (4.93) |
| 3                           | 25.7 (4.06) | 31.4 (4.24) | 58.0 (4.47) | 134.9 (4.71)                | 32.4 (4.63) | 31.5 (4.67) | 60.0 (4.80)  | 164.6 (4.93) |
| 4                           | 27.2 (4.14) | 33.3 (4.33) | 62.0 (4.54) | 147.1 (4.76)                | 33.2 (4.68) | 32.8 (4.74) | 62.4 (4.84)  | 171.2 (4.94) |
| 5                           | 26.4 (4.13) | 32.0 (4.30) | 59.1 (4.51) | 138.3 (4.73)                | 31.5 (4.65) | 30.3 (4.69) | 56.6 (4.81)  | 148.6 (4.93) |
| Avg.                        | 27.5 (4.13) | 33.5 (4.31) | 62.5 (4.52) | 148.9 (4.75)                | 32.0 (4.67) | 30.8 (4.71) | 58.0 (4.82)  | 154.6 (4.93) |
| COO [Ph(C)-BiPh(O)-PhTh(O)] |             |             |             | OCO [Ph(O)-BiPh(C)-PhTh(O)] |             |             |              |              |
| 7                           | 32.2 (2.93) | 37.3 (2.91) | 78.9 (3.27) | 327.6 (3.93)                | 35.7 (3.24) | 36.9 (3.16) | 69.7 (3.27)  | 206.3 (3.11) |
| 8                           | 37.4 (2.96) | 43.8 (2.96) | 94.2 (3.32) | 395.5 (4.11)                | 35.7 (3.23) | 36.9 (3.16) | 69.9 (3.27)  | 207.4 (3.12) |
| 9                           | 32.8 (2.91) | 38.2 (2.90) | 80.6 (3.25) | 333.4 (3.91)                | 36.2 (3.05) | 37.8 (3.02) | 71.8 (3.13)  | 214.4 (2.97) |
| Avg.                        | 33.8 (2.93) | 39.3 (2.92) | 83.6 (3.28) | 347.8 (3.98)                | 35.8 (3.23) | 36.9 (3.16) | 69.8 (3.27)  | 206.6 (3.11) |
| OOC [Ph(O)-BiPh(O)-PhTh(C)] |             |             |             | OOO [Ph(O)-BiPh(O)-PhTh(O)] |             |             |              |              |
| 1                           | 31.3 (3.24) | 32.7 (3.16) | 57.8 (3.37) | 150.1 (3.84)                | 30.7 (3.24) | 32.7 (3.16) | 62.2 (3.37)  | 178.6 (3.84) |
| 2                           | 31.8 (3.31) | 32.5 (3.25) | 59.7 (3.47) | 154.9 (3.93)                | 31.8 (3.23) | 34.4 (3.14) | 65.6 (3.38)  | 189.2 (3.86) |
| 3                           | 31.9 (3.23) | 32.4 (3.14) | 60.0 (3.38) | 159.3 (3.86)                |             |             |              |              |
| Avg.                        | 31.4 (3.25) | 32.7 (3.16) | 58.2 (3.38) | 151.3 (3.85)                | 30.7 (3.24) | 32.8 (3.16) | 62.4 (3.37)  | 179.2 (3.84) |

Table S20: Computed static and dynamic first hyperpolarizabilities ( $\beta_{HRS}$  in  $10^3$  a.u., DR in parentheses) for the different conformers of compound **3b**, as evaluated at the TDDFT/M06-2X/6-311+G(d)/IEF-PCM (acetonitrile) level of approximation. The last line contains averaged values using the MB population at 298.15 K as calculated at the  $\omega$ B97X-D/6-311G(d)/IEF-PCM (acetonitrile) level of theory.

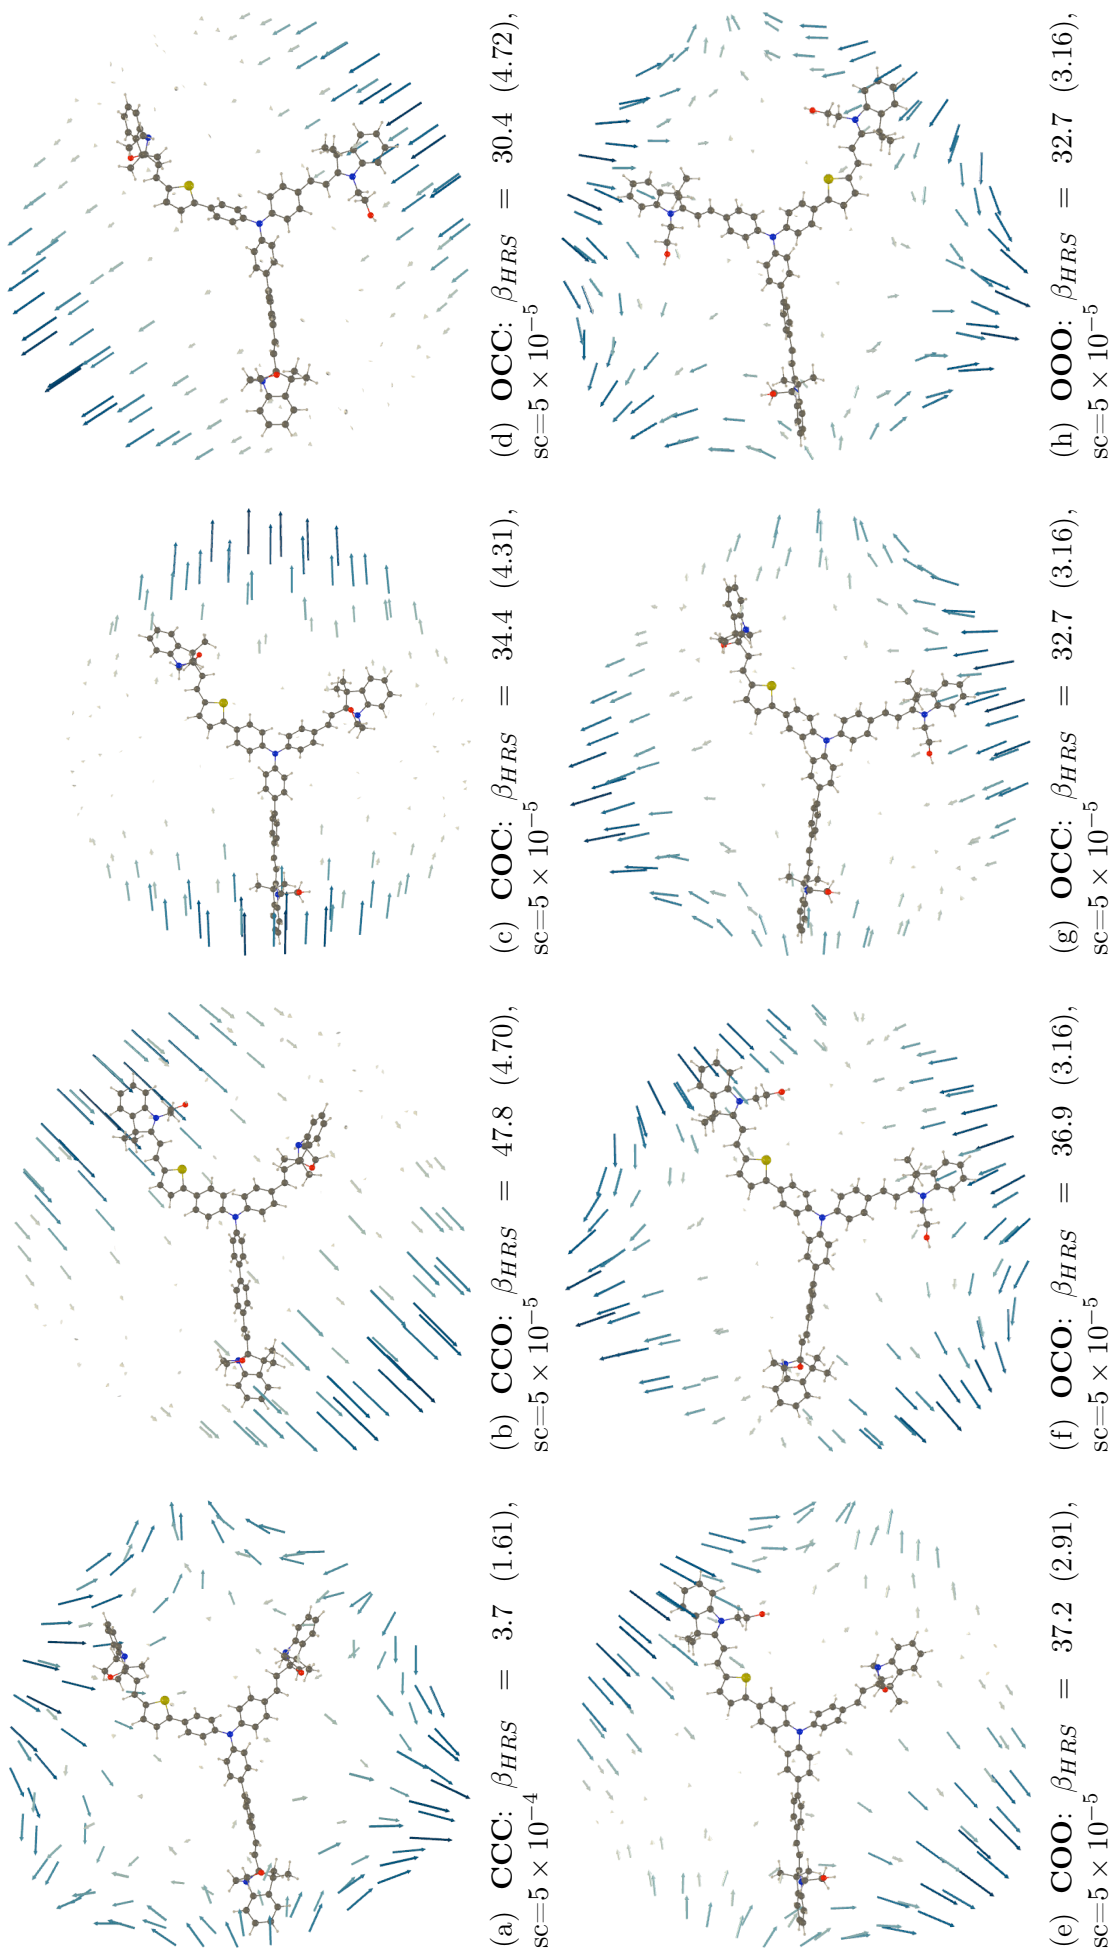

Figure S8: USR (together with  $\beta_{HRS}$  [ $10^3$  a.u., DR in parentheses] and scaling factor [ $sc$ ,  $\text{\AA a.u.}^{-1}$ ]) of the dynamic ( $\lambda = 1907$  nm)  $\beta$  tensor of the most stable conformers of each form of **3b**, as evaluated at the TDDFT/M06-2X/6-311+G(d)/IEF-PCM (acetonitrile) level of approximation.

## S3 Excitation energies

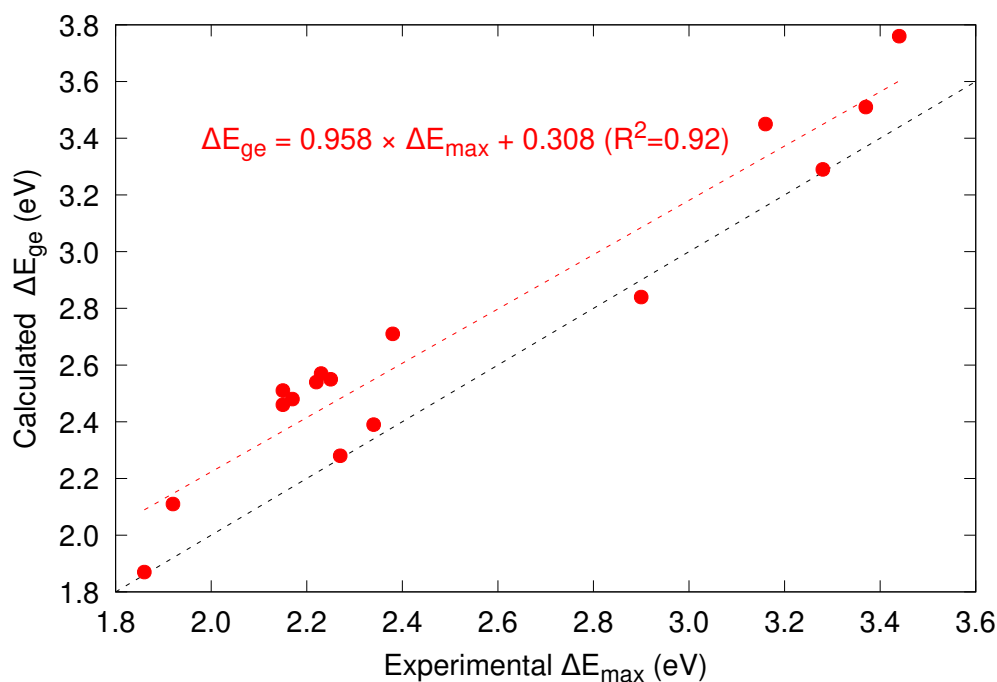

Figure S9: Correlation (in dashed red) between experimental first maximum absorption energies ( $\Delta E_{\max}$ , eV) and calculated first vertical transition energies ( $\Delta E_{ge}$ ), as evaluated at the TDDFT/M06-2X/6-311+G(d)/IEF-PCM (acetonitrile) level of approximation. This includes compounds **1** (experimental values from Ref. [1], for R=Me, calculated values for R=H recomputed from our conformers), **2a** and **2e** (experimental and calculated values from Ref. [2]), and **3a-3b** (experimental and calculated values from Ref. [3]). The dashed black line represents perfect agreement.

## References

- [1] Pielak, K. *et al.* Second-Order Nonlinear Optical Properties of Multiaddressable Indolinoxazolidine Derivatives: Joint Computational and Hyper-Rayleigh Scattering Investigations. *J. Phys. Chem. C* **121**, 1851–1860 (2017).
- [2] Quertinmont, J. *et al.* Combining Benzazolo-Oxazolidine Twins toward Multi-state Nonlinear Optical Switches. *J. Phys. Chem. B* **125**, 3918–3931 (2021).
- [3] Aidibi, Y. *et al.* A molecular loaded dice: When the  $\pi$  conjugation breaks the statistical addressability of an octastate multimodal molecular switch. *Dyes Pigments* **202**, 110270 (2022).
